# 1 **Adipocyte REVERB $\alpha$ dictates adipose tissue expansion during obesity**

2

3 A. Louise Hunter<sup>1,5</sup>, Charlotte E. Pelekanou<sup>1,5</sup>, Nichola J. Barron<sup>1</sup>, Rebecca C. Northeast<sup>1</sup>,  
4 Antony Adamson<sup>1</sup>, Polly Downton<sup>1</sup>, Thomas Cornfield<sup>2</sup>, Peter S. Cunningham<sup>1</sup>, Leanne  
5 Hodson<sup>2</sup>, Andrew S.I. Loudon<sup>1</sup>, Richard D. Unwin<sup>3</sup>, Mudassar Iqbal<sup>4</sup>, David W. Ray<sup>2</sup>, David A.  
6 Bechtold<sup>1</sup>

7

8 1. Centre for Biological Timing, Faculty of Biology, Medicine and Health, University of  
9 Manchester

10 2. Oxford Centre for Diabetes, Endocrinology and Metabolism, University of Oxford, and NIHR  
11 Oxford Biomedical Research Centre, John Radcliffe Hospital

12 3. Stoller Biomarker Discovery Centre, Division of Cancer Sciences, Faculty of Biology,  
13 Medicine and Health, University of Manchester

14 4. Division of Informatics, Imaging & Data Sciences, Faculty of Biology, Medicine and Health,  
15 University of Manchester

16 5. These authors contributed equally

17

18 Correspondence:

19 David A. Bechtold, 3.002 AV Hill Building, University of Manchester, Manchester, M13 9PT,  
20 UK; [David.Bechtold@manchester.ac.uk](mailto:David.Bechtold@manchester.ac.uk), Tel: +44(0)161 2755721

21

22 **Keywords:** Circadian clock, energy metabolism, obesity, metabolic disease, adipose, nuclear  
23 hormone receptor, NR1D1, extracellular matrix

24 **ABSTRACT**

25

26 The circadian clock component REVERB $\alpha$  is considered a dominant regulator of lipid  
27 metabolism, with global *Reverba* deletion driving dysregulation of white adipose tissue (WAT)  
28 lipogenesis and obesity. However, a similar phenotype is not observed under adipocyte-  
29 selective deletion (*Reverba*<sup>Flox2-6</sup>*Adipo*<sup>Cre</sup>), and transcriptional profiling demonstrates that,  
30 under basal conditions, direct targets of REVERB $\alpha$  regulation are limited, and include the  
31 circadian clock and collagen dynamics. Under high-fat diet (HFD) feeding, *Reverba*<sup>Flox2-</sup>  
32 <sup>6</sup>*Adipo*<sup>Cre</sup> mice do manifest profound obesity, yet without the accompanying WAT inflammation  
33 and fibrosis exhibited by controls. Integration of the WAT REVERB $\alpha$  cistrome with differential  
34 gene expression reveals broad control of metabolic processes by REVERB $\alpha$  which is  
35 unmasked in the obese state. Adipocyte REVERB $\alpha$  does not drive an anticipatory daily rhythm  
36 in WAT lipogenesis, but rather modulates WAT activity in response to alterations in metabolic  
37 state. Importantly, REVERB $\alpha$  action in adipocytes is critical to the development of obesity-  
38 related WAT pathology and insulin resistance.

## 39 INTRODUCTION

40

41 The mammalian circadian clock directs rhythms in behaviour and physiology to coordinate our  
42 biology with predictable changes in food availability and daily alternations between fasted and  
43 fed states. In this way, profound cycles in nutrient availability and internal energy state can be  
44 managed across multiple organ systems. A central circadian clock in the suprachiasmatic  
45 nuclei (SCN) drives daily rhythms in our behaviour (e.g. sleep/wake cycles) and physiology  
46 (e.g. body temperature), and orchestrates rhythmic processes in tissue systems across the  
47 body (Dibner et al., 2010; West and Bechtold, 2015). The molecular clock mechanism is also  
48 present in most cells and tissue. Normal peripheral tissue function and expression of a  
49 'complete' rhythmic transcriptome requires local tissue clock activity, as well as input from the  
50 central clock and rhythmic systemic signals (Guo et al., 2005; Hughes et al., 2012; Kornmann  
51 et al., 2007; Koronowski et al., 2019; Lamia et al., 2008). The relative importance of each of  
52 these factors remains ill-defined. Nevertheless, it is clear that our rhythmic physiology and  
53 metabolic status reflects the interaction of clocks across the brain and body (West and  
54 Bechtold, 2015). Disturbance of this interaction, as occurs with shift work and irregular eating  
55 patterns, is increasingly recognised as a risk factor for metabolic disease and obesity  
56 (Broussard and Cauter, 2016; Kim et al., 2019).

57

58 Extensive work over the past 20 years has demonstrated that circadian clock function and its  
59 component factors are closely tied into energy metabolism (Bass and Takahashi, 2010; Reinke  
60 and Asher, 2019), with strong rhythmicity evident in cellular and systemic metabolic processes.  
61 Clock-metabolic coupling in peripheral tissues is adaptable, as demonstrated by classical  
62 food-entrainment studies (Damiola et al., 2000; Mistlberger, 1994), and by recent work  
63 showing that systemic perturbations such as cancer and high-fat diet feeding can re-  
64 programme circadian control over liver metabolism (Dyar et al., 2018; Masri et al., 2016).  
65 Plasticity therefore exists within the system, and the role of the clock in tissue and systemic  
66 responses to acute and chronic metabolic perturbation remains a critical question. The nuclear

67 receptor REVERB $\alpha$  (NR1D1) is a core clock component, and has been highlighted as a key  
68 link between the clock and metabolism. REVERB $\alpha$  is a constitutive repressor, with peak  
69 expression in the latter half of the inactive phase (daytime in the nocturnal animal). In liver,  
70 REVERB $\alpha$  exerts repressive control over programmes of lipogenesis by recruiting the  
71 NCOR/HDAC3 co-repressor complex to metabolic target genes, such that loss of REVERB $\alpha$   
72 or HDAC3 results in hepatosteatosis (Feng et al., 2011; Zhang et al., 2016, 2015). The  
73 selective functions of REVERB $\alpha$  in white adipose tissue (WAT) are not well-established and  
74 remain poorly understood. Early studies implicated an essential role of *Reverba* in adipocyte  
75 differentiation (Chawla and Lazar, 1993; Kumar et al., 2010); however, these findings are  
76 difficult to align with *in vivo* evidence. Indeed, pronounced adiposity and adipocyte hypertrophy  
77 are evident in *Reverba*<sup>-/-</sup> mice, even under normal feeding conditions (Delezie et al., 2012;  
78 Hand et al., 2015; Zhang et al., 2015). Moreover, daily administration of REVERB $\alpha$  agonists  
79 has been shown to reduce fat mass and WAT lipogenic gene expression in mice (Solt et al.,  
80 2012), despite concerns about off-targets actions of these agents (Dierickx et al., 2019). Given  
81 the links between circadian disruption and obesity, and the potential of REVERB $\alpha$  as a  
82 pharmacological target, we now define the role of REVERB $\alpha$  in dictating WAT metabolism.

83

84 Transcriptomic and proteomic profiling of WAT in global *Reverba*<sup>-/-</sup> mice revealed an expected  
85 de-repression of lipid synthesis and storage programmes. However, in contrast, selective  
86 deletion of *Reverba* in adipocytes did not result in dysregulation of WAT metabolic pathways.  
87 Loss of REVERB $\alpha$  activity in WAT did, however, significantly enhance adipose tissue  
88 expansion in response to HFD feeding; yet despite the exaggerated obesity, adipocyte-specific  
89 knockout mice were spared anticipated obesity-related pathology. Integration of transcriptomic  
90 data with the WAT REVERB $\alpha$  cistrome demonstrates that, under basal conditions, REVERB $\alpha$   
91 activity is limited to a small set of direct target genes (enriched for extracellular matrix  
92 processes). However, REVERB $\alpha$ -regulatory control broadens to include lipid and  
93 mitochondrial metabolism pathways under conditions of obesity. Our data recast the role of

- 94 REVERB $\alpha$  as a regulator responsive to the metabolic state of the tissue, rather than one which
- 95 delivers an anticipatory daily oscillation to the WAT metabolic programme.

96 **RESULTS**

97

98 **Adiposity and up-regulation of WAT lipogenic pathways in *Reverba*<sup>-/-</sup> mice**

99 We first examined the body composition of age-matched *Reverba* global knockout (KO)  
100 (*Reverba*<sup>-/-</sup>) mice and littermate controls (WT). In keeping with previous reports (Delezie et al.,  
101 2012; Hand et al., 2015), *Reverba*<sup>-/-</sup> mice are of similar body weight to littermate controls  
102 (**Figure 1A**), yet carry an increased proportion of fat mass (KO: 24.2 ±3.0% of body weight;  
103 WT: 10.8 ±1.4%; mean ±SEM, P<0.01 Student's t-test, n=12-14/group) and display adipocyte  
104 hypertrophy (**Figure 1B**), even when maintained on a standard chow diet. Metabolic  
105 phenotyping demonstrated expected day-night differences in food intake, energy expenditure,  
106 activity, and body temperature in both KO and WT controls, although genotype differences in  
107 day/night activity and temperature levels suggest some dampening of rhythmicity in the  
108 *Reverba*<sup>-/-</sup> mice (**Figure 1 Supplemental A-E**). However, this is unlikely to account for the  
109 increased adiposity in these animals, and a previous study did not report significant genotype  
110 differences in these parameters (Delezie et al., 2012). This favours instead an altered energy  
111 partitioning within these mice, with a clear bias towards storing energy as lipid.

112

113 To explore further the lipid storage phenotype, we undertook proteomic analysis of gonadal  
114 white adipose tissue (gWAT) collected at ZT8 (*zeitgeber* time, 8h after lights on), the time of  
115 normal peak in REVERBα expression in this tissue (**Figure 1 Supplemental F**). Isobaric tag  
116 (iTRAQ) labelled LC-MS/MS identified 2257 proteins, of which 182 demonstrated differential  
117 regulation (FDR<0.05) between WT and *Reverba*<sup>-/-</sup> gWAT samples (n=6 weight-matched, 13-  
118 week old male mice/group) (**Figure 1C**). Differentially expressed proteins included influential  
119 metabolic enzymes, with up-regulation of metabolic processes detected on pathway  
120 enrichment analysis (**Figure 1D**). Importantly, and in line with the phenotype observed,  
121 increased NADPH regeneration (e.g. ME1, G6PDX), enhancement of glucose metabolism,  
122 (also likely reflecting increased glyceroneogenesis; e.g. PFKL, ALDOA), and up-regulation of  
123 fatty acid synthesis (e.g. ACYL, FAS, ACACA) all support a shunt towards synthesis and

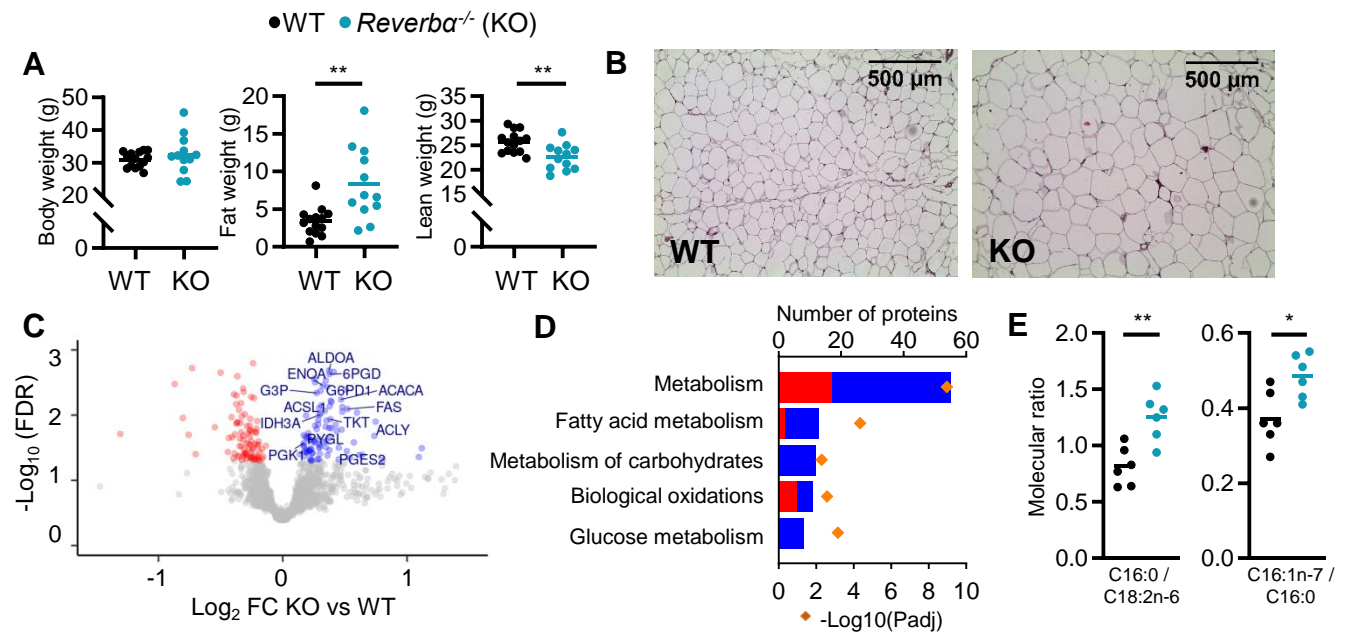

**FIGURE 1. Global deletion of *Reverba* results in obesity and increased adipose lipid synthesis.**

**A.** *Reverba*<sup>-/-</sup> mice exhibit significantly greater fat mass relative to WT littermate controls. Body weight, fat mass and lean mass of 13-week old males (n=12-14/group). **B.** Increased fat mass in *Reverba*<sup>-/-</sup> mice is reflected in adipocyte hypertrophy in gonadal white adipose tissue (gWAT) (representative x10 H&E images shown). **C,D.** gWAT from *Reverba*<sup>-/-</sup> mice exhibits a programme of increased lipid synthesis. Proteomic profiling of gWAT depots (*Reverba*<sup>-/-</sup> mice plotted relative to their respective weight-matched littermate controls, n=6/group) (**C**) shows deregulation of metabolic regulators and enrichment (**D**) of metabolic pathways (up- and down-regulated proteins shown in blue and red respectively). Top five (by protein count) significantly enriched Reactome terms shown. **E.** Analyses of fatty acid (FA) composition reveal increased *de novo* lipogenesis (reflected by C16:0/C18:2n ratio) and FA desaturation (reflected by C16:1n-7/C16:0 ratio) in gWAT of *Reverba*<sup>-/-</sup> mice. n=6/group.

Data presented as mean with individual data points (**A**, **E**). \*P<0.05, \*\*P<0.01, unpaired two-tailed t-test (**A**, **E**).

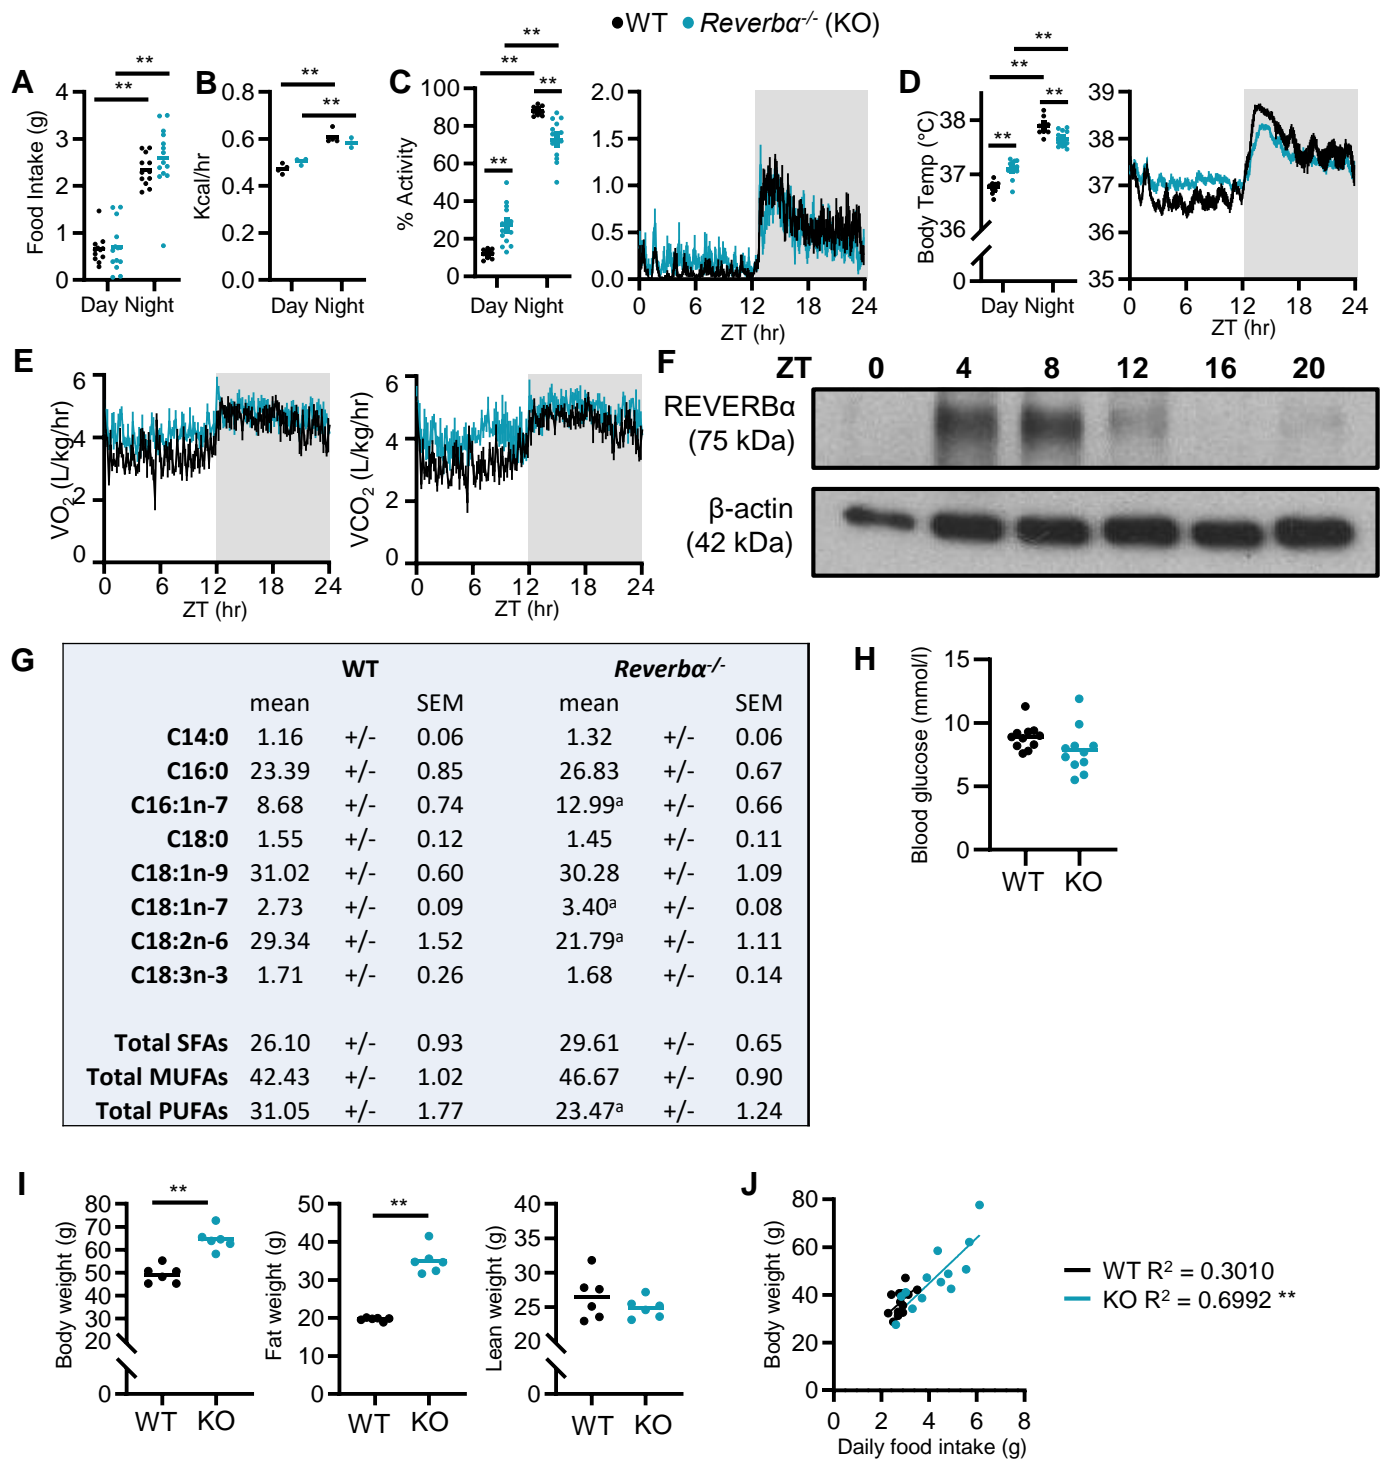

**FIGURE 1 SUPPLEMENTAL. Rhythmic physiology and susceptibility to diet-induced obesity in *Reverba*<sup>-/-</sup> mice.**

**A-E.** Under light:dark conditions, *Reverba*<sup>-/-</sup> mice maintain robust diurnal rhythms in physiology and behaviour. Day/night food intake (**A**) (n=12-14/group), and energy expenditure (**B**) (n=3-4/group). Diurnal activity profile, mean activity (**C**) and body temperature (**D**) of adult male *Reverba*<sup>-/-</sup> mice (activity is reported as the % daily activity, n=9-13/group). Diurnal profiles in oxygen consumption ( $VO_2$ ) and carbon dioxide production ( $VCO_2$ ) (**E**) (n=9-13/group). **F.** Western blot showing REVERBα expression in adipose tissue over 24 hours. **G.** Molar percentages of fatty acid species in WT and *Reverba*<sup>-/-</sup> gWAT. n=6/group. <sup>a</sup>P<0.05. **H.** Daytime (ZT6) fasted blood glucose levels (n=11/group). **I.** *Reverba*<sup>-/-</sup> mice are highly susceptible to diet-induced obesity, showing significantly higher body weights and fat mass than control mice after 10 weeks of HFD feeding (n=6/group). **J.** In a separate study, food intake was tracked for individual mice over 3 weeks of HFD feeding (n = 13/group). Mean daily food intake in *Reverba*<sup>-/-</sup> mice showed a significant positive correlation with body weight.

Data presented as individual data points with mean (**A-D, H, I**), as mean +/- SEM (**F**), or as individual data points with line of best fit (**J**). \*\*P<0.01, two-way ANOVA with Tukey's multiple comparisons tests (**A-D**), unpaired t-tests with correction for multiple testing (**G**), unpaired two-tailed t-tests (**H,I**), linear regression (**J**).



125 storage of fatty acids and triglyceride in the knockout mice. To validate this putative increase  
126 in local lipid synthesis, we quantified fatty acid species in gWAT, and indeed, the ratio of  
127 palmitic to linoleic acid (C16:0/C18:2n6), a marker of *de novo* lipogenesis, was significantly  
128 elevated in *Reverba*<sup>-/-</sup> samples (**Figure 1E, Figure 1 Supplemental G**). Fatty acid profiling  
129 also revealed evidence of increased SCD1 activity (C16:1n-7/C16:0). Enhanced fatty acid  
130 synthesis in gWAT of mice lacking REVERB $\alpha$  may be in part driven by increased glucose  
131 availability and adipose tissue uptake as previously suggested (Delezie et al., 2012), although  
132 we do not observe elevated blood glucose levels in the *Reverba*<sup>-/-</sup> animals (**Figure 1**  
133 **Supplemental H**). The propensity to lipid storage is further highlighted by the substantial  
134 obesity, compared to littermate controls, displayed by *Reverba*<sup>-/-</sup> mice when challenged with  
135 10 weeks of high-fat diet (HFD) (**Figure 1 Supplemental I**; Delezie et al., 2012; Hand et al.,  
136 2015). Interestingly, we observed a strong positive correlation between body weight and daily  
137 intake of HFD in the *Reverba*<sup>-/-</sup> mice (**Figure 1 Supplemental J**), suggesting that HFD-induced  
138 hyperphagia exacerbates weight gain and obesity in the *Reverba*<sup>-/-</sup> mice.

139

#### 140 **Limited impact of adipocyte-selective *Reverba* deletion under basal conditions**

141 To define the role of REVERB $\alpha$  specifically within WAT, we generated a new mouse line with  
142 loxP sites flanking *Reverba* exons 2-6 (*Reverba*<sup>Flox2-6</sup>), competent for Cre-mediated conditional  
143 deletion (**Figure 2A**; Hunter et al., 2020). We crossed this mouse with the well-established  
144 adiponectin Cre-driver line (*Adipo*<sup>Cre</sup>; Eguchi et al., 2011; Jeffery et al., 2014) to delete *Reverba*  
145 selectively in adipocytes. This new line results in loss of *Reverba* mRNA (**Figure 2B**) and  
146 protein (**Figure 2C**) expression in adipose tissue depots, as well as coordinate de-repression  
147 of *Bmal1*, upon Cre-mediated recombination.

148

149 In marked contrast to global *Reverba*<sup>-/-</sup> mice, adult *Reverba*<sup>Flox2-6</sup>*Adipo*<sup>Cre</sup> mice did not show an  
150 increase in adiposity when maintained on a standard chow diet (**Figure 2D**; n=7/group), with  
151 no differences in mean body weight, fat and lean mass observed. In parallel with this, we saw

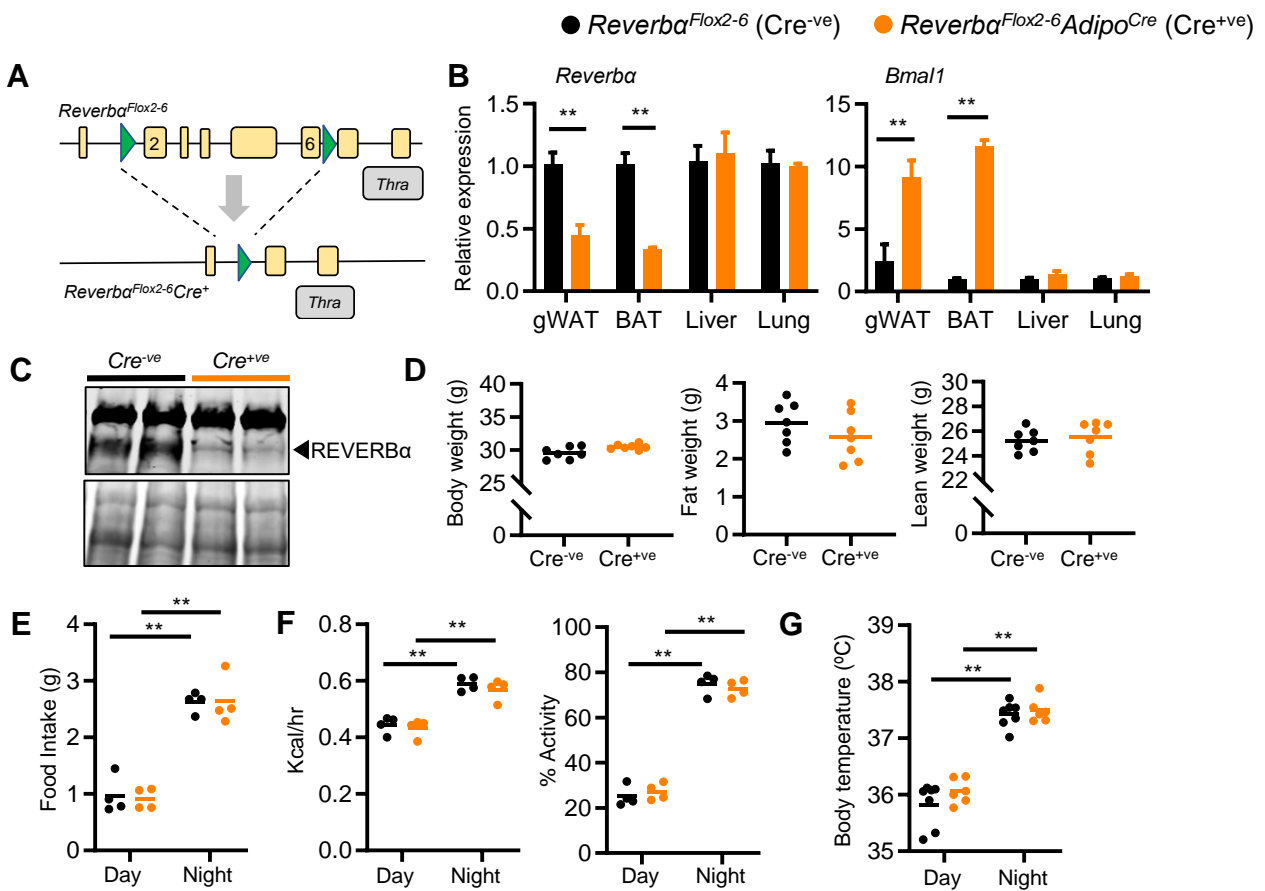

**FIGURE 2. Impact of adipose *Reverba* deletion is limited under normal conditions.**

**A.** Targeting strategy for LoxP site integration flanking exons 2-6 of the *Nr1d1* (*Reverba*) locus. **B.** *Reverba* and *Bmal1* gene expression in gWAT, brown adipose (BAT), liver and lung in *Reverba*<sup>Flox2-6</sup> (Cre<sup>-ve</sup>) and *Reverba*<sup>Flox2-6AdipoCre</sup> (Cre<sup>+ve</sup>) mice (n=4-5/group). **C.** REVERB $\alpha$  protein expression (arrowhead) in Cre<sup>-ve</sup> and targeted Cre<sup>+ve</sup> mice. Lower blot shows Ponceau S protein staining. **D.** Body weight, fat mass and lean mass in 13-week old Cre<sup>-ve</sup> and Cre<sup>+ve</sup> male mice (n=7/group). **E-G.** Both *Reverba*<sup>Flox2-6AdipoCre</sup> Cre<sup>+ve</sup> and Cre<sup>-ve</sup> mice demonstrate diurnal rhythms in behaviour and physiology, with no genotype differences observed in food intake (**E**), energy expenditure and daily activity (**F**) or body temperature (**G**) in 13-week old males (n=4-7/group).

Data presented as mean  $\pm$  SEM (**B**), or as mean with individual data points (**D-G**). \*P<0.05, \*\*P<0.01, unpaired t-tests corrected for multiple comparisons (**B**), unpaired t-tests (**D**), two-way ANOVA with Tukey's multiple comparisons tests (**E-G**).

● *Reverba<sup>Flox2-6</sup>* ● *Reverba<sup>Flox2-6</sup>Adipo<sup>Cre</sup>*

**A Room Temperature (23°C)**

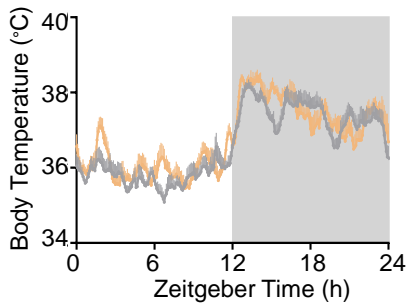

**B**

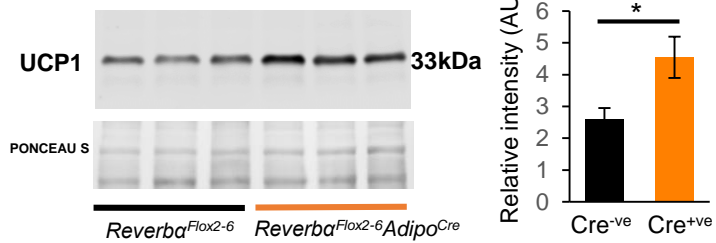

**C Thermoneutral (29°C)**

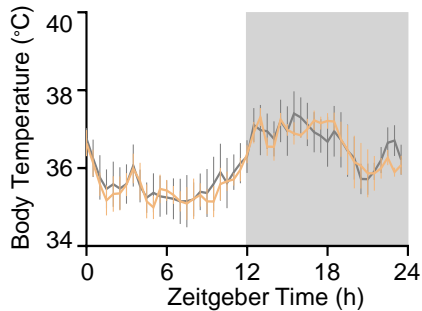

**D**

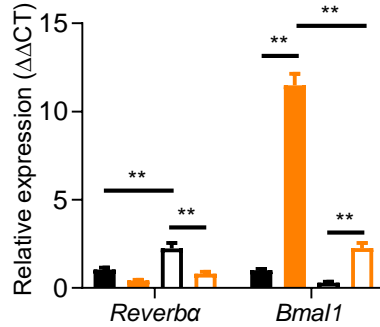

**E**

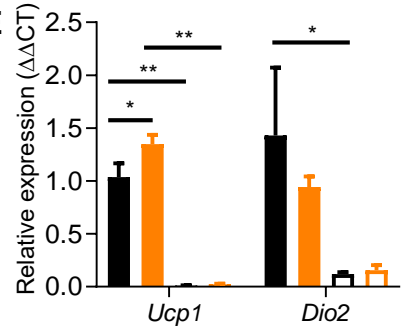

**F Cold Challenge (4°C)**

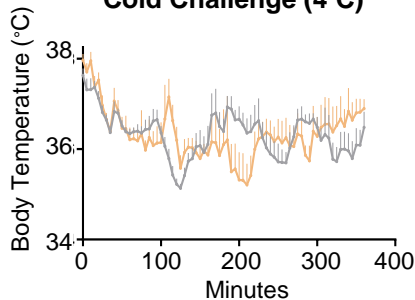

**G**

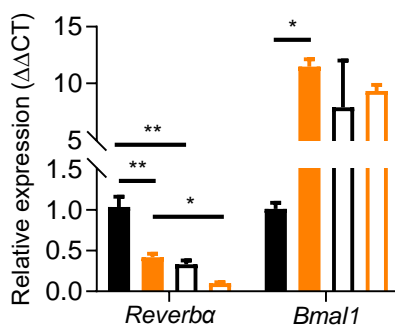

**H**

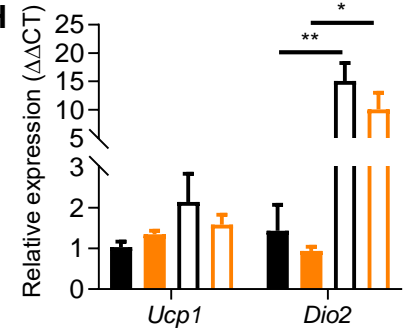

**FIGURE 2 SUPPLEMENTAL. Loss of *Reverba* expression in brown adipocytes does not alter body temperature.**

**A-B.** Housing under standard laboratory conditions did not alter daily profiles in body temperature in the *Reverba<sup>Flox2-6</sup>Adipo<sup>Cre</sup>* Cre<sup>+ve</sup> mice, when compared to control Cre<sup>-ve</sup> littermate controls (**A**; n=5-6/group), despite showing increased UCP1 expression (**B**; n=3/group). **C.** No intergenotype genotype differences were observed in body temperature profiles recorded from mice housed under thermoneutral conditions (28-30°C) for 3 weeks (n=5-6/group). **D-E.** Brown adipose tissue (BAT) gene expression studies (qPCR) demonstrated expected de-repression of *Bmal1* expression in Cre<sup>+ve</sup> mice, and expected reduction in *Ucp1* expression at thermoneutral conditions in both genotypes (compared to room temperature) (n=5-6/group). **F.** *Reverba<sup>Flox2-6</sup>Adipo<sup>Cre</sup>* Cre<sup>+ve</sup> mice and control littermates were exposed to an acute cold challenge (4°C for 6 h) with body temperature recording throughout (n=5-6/group). No genotype difference in thermogenic response was observed. **G-H.** As previously reported, *Reverba* expression was reduced by cold exposure; however, no genotype differences were observed cold-induced increases in *Ucp1* or *Dio2* gene expression (n=5-6/group).

Data presented as mean +/- SEM. \*P<0.05, \*\*P<0.01, Student's t-test (**B**), 2-way ANOVA with Tukey's multiple comparisons tests (**D, E, G, H**).

152 no differences in daily patterns of food intake, energy expenditure, activity levels or body  
153 temperature in matched *Reverba*<sup>Flox2-6</sup>*Adipo*<sup>Cre</sup> and control (*Reverba*<sup>Flox2-6</sup>) mice (**Figure 2D,E**).

154

155 As brown adipose tissue (BAT) makes an important contribution to whole body energy  
156 metabolism, we studied the thermoregulation of *Reverba*<sup>Flox2-6</sup>*Adipo*<sup>Cre</sup> mice in greater detail.

157 It has previously been proposed that REVERB $\alpha$  is key in conferring circadian control over  
158 thermogenesis, through its repression of uncoupling protein 1 (UCP1) (Gerhart-Hines et al.,

159 2013). However, we saw no genotype differences in thermoregulation between *Reverba*<sup>Flox2-6</sup>  
160 *Adipo*<sup>Cre</sup> and *Reverba*<sup>Flox2-6</sup> mice (**Figure 2 Supplemental A-E**). Despite increased BAT UCP1

161 expression, no differences in body temperature profiles were observed between Cre<sup>-ve</sup> and  
162 Cre<sup>+ve</sup> mice when housed under normal laboratory temperature (~22°C) nor when placed

163 under thermoneutral conditions (29°C) for >14days. Moreover, Cre<sup>-ve</sup> and Cre<sup>+ve</sup> mice did not  
164 differ in their thermogenic response to an acute cold challenge (4°C for 6hr) (**Figure 2**

165 **Supplemental F-H**). Therefore, the minimal impact on body composition of adipose-targeted  
166 *Reverba* deletion cannot be explained by altered BAT thermogenic activity, and moreover,

167 these data challenge existing theories about the role of *Reverba* in thermoregulation.

168

### 169 **In normal WAT, REVERB $\alpha$ -regulated targets are limited to clock and collagen genes**

170 To investigate adipocyte-specific *Reverba* activity, we performed RNA-seq at ZT8 (n=6/group)  
171 in both *Reverba*<sup>-/-</sup> and *Reverba*<sup>Flox2-6</sup>*Adipo*<sup>Cre</sup> mouse lines. Global *Reverba* deletion had a large

172 effect on the gWAT transcriptome, with 4163 genes showing significant differential expression  
173 (FDR<0.05) between *Reverba*<sup>-/-</sup> mice and age- and weight-matched WT littermate controls

174 (**Figure 3A**). Pathway enrichment analysis demonstrated that these changes are dominated  
175 by metabolic genes (**Figure 3B(i)**), with lipid metabolism and the TCA cycle emerging as

176 prominent processes (**Figure 3B(ii)**). Thus, the gWAT transcriptome in *Reverba*<sup>-/-</sup> mice is  
177 concordant with the phenotype, and the gWAT proteome, in demonstrating up-regulation of

178 lipid accumulation and storage processes.

179

180 By contrast, and consistent with the absence of an overt phenotype, only a small genotype  
181 effect on the transcriptome was observed when comparing gWAT RNA-seq from *Reverba*<sup>Flox2-</sup>  
182 <sup>6</sup>*Adipo*<sup>Cre</sup> and *Reverba*<sup>Flox2-6</sup> littermates (**Figure 3C**; n=6/group). Here, 238 genes showed  
183 significant differential expression between genotypes, of which 128 were also differentially  
184 regulated in the WAT analysis of global *Reverba*<sup>-/-</sup> mice (**Figure 3D**). These 128 common  
185 genes included circadian clock components (*Bmal1*, *Clock*, *Cry2*, *Nfil3*), whilst pathway  
186 analysis also revealed collagen formation/biosynthesis processes to be significantly enriched  
187 (**Figure 3C**). Regulation of the molecular clock is expected, but the discovery of collagen  
188 dynamics as a target of REVERB $\alpha$  regulatory action in adipocytes has not been previously  
189 recognised. We validated consistent up-regulation of collagen and collagen-modifying genes  
190 in *Reverba*<sup>-/-</sup> and *Reverba*<sup>Flox2-6</sup>*Adipo*<sup>Cre</sup> gWAT by qPCR (**Figure 3F**).

191

192 It is notable that *Reverba*<sup>Flox2-6</sup>*Adipo*<sup>Cre</sup> mouse gWAT exhibits neither enrichment of lipid  
193 metabolic pathways, nor de-regulation of individual key lipogenic genes, previously identified  
194 as REVERB $\alpha$  targets (**Figure 3E,G**) (Feng et al., 2011; Zhang et al., 2016, 2015). These  
195 findings suggest lipogenic gene regulation may be a response to system-wide changes in  
196 energy metabolism in the *Reverba*<sup>-/-</sup> animals, and challenge current understanding of  
197 REVERB $\alpha$  action.

198

199 Work in liver has suggested that the REVERB $\alpha$  paralogue, REVERB $\beta$ , contributes to the  
200 suppression of lipogenesis, and that concurrent REVERB $\beta$  deletion amplifies the impact of  
201 REVERB $\alpha$  loss (Bugge et al., 2012). We therefore performed double knock-down of *Reverba*  
202 and *Reverb $\beta$*  in differentiated 3T3-L1 cells (**Figure 3 Supplemental A**). Whilst double knock-  
203 down produced greater *Bmal1* de-repression than either *Reverba* or *Reverb $\beta$*  knock-down  
204 alone, it did not lead to de-repression of lipogenic genes previously considered REVERB $\alpha$   
205 targets (**Figure 3 Supplemental B**). This suggests that compensation by *Reverb $\beta$*  does not  
206 underlie the mild phenotype observed in the *Reverba*<sup>Flox2-6</sup>*Adipo*<sup>Cre</sup> mice.

207

■ Up-regulated ■ Down-regulated

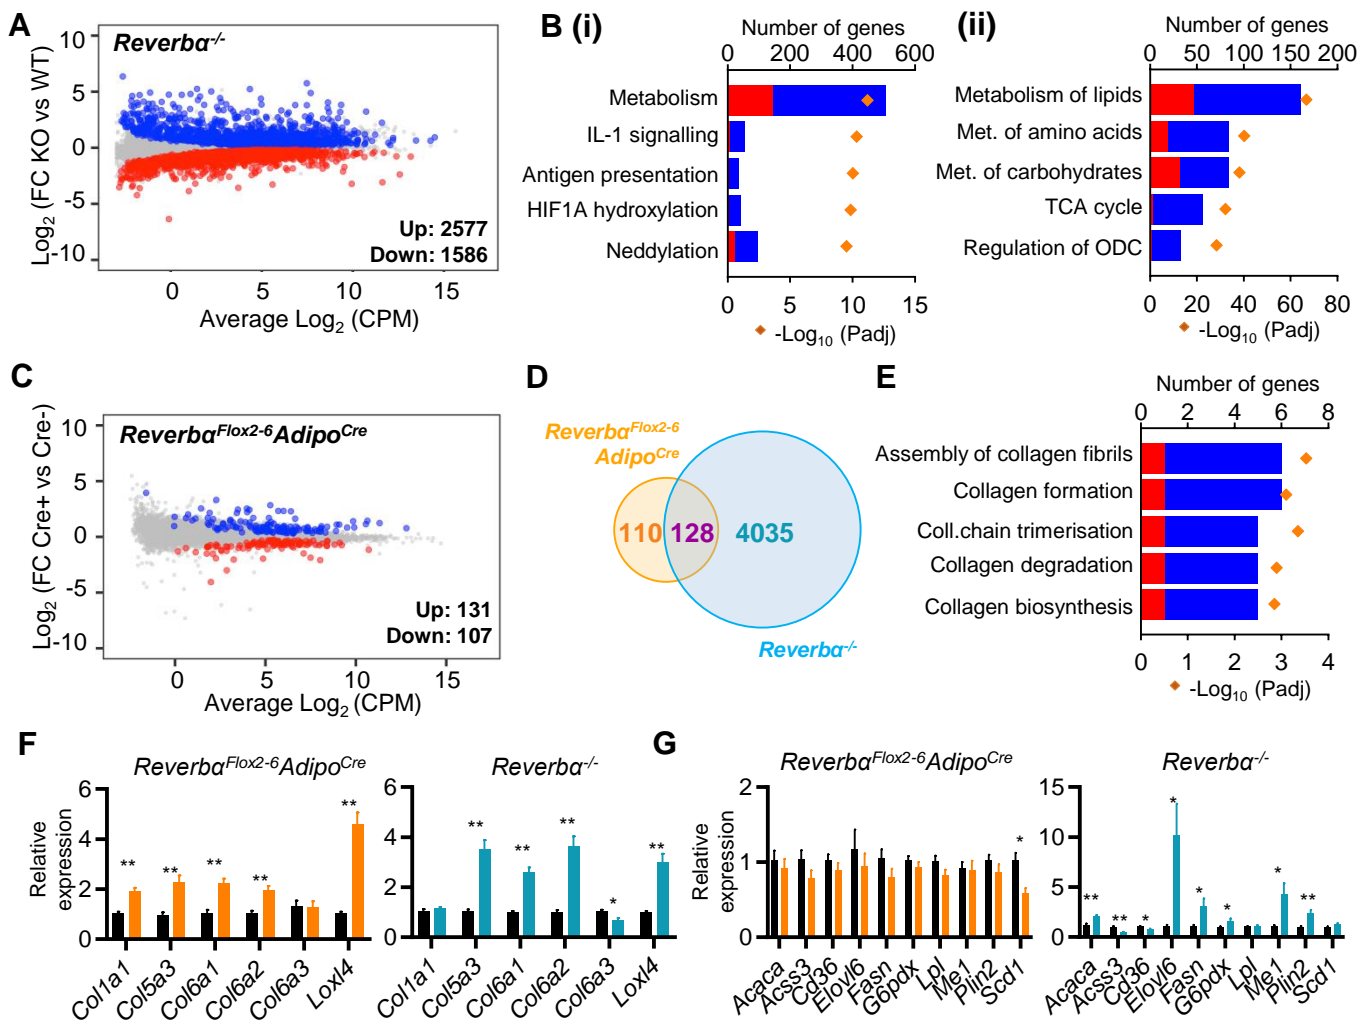

**FIGURE 3. Global or adipose-specific *Reverba* deletion produces distinctive gene expression profiles.**

**A, B.** *Reverba*<sup>-/-</sup> gWAT demonstrates extensive remodelling of the transcriptome and up-regulation of metabolic pathways. Mean-difference (MD) plot (**A**) showing significantly (FDR<0.05) up- (blue) and down- (red) regulated genes in gWAT of *Reverba*<sup>-/-</sup> mice compared to littermate controls (n=6/group). Pathway analysis (**B**) of significantly differentially expressed genes (FDR<0.05): top five (by gene count) significantly enriched Reactome terms shown (**B(i)**), top 5 metabolic pathways shown (**B(ii)**). Up-regulated genes in blue, down-regulated in red. ODC = ornithine decarboxylase. **C.** By contrast, RNA-seq demonstrates modest remodelling of the transcriptome in gWAT of *Reverba*<sup>Flox2-6 AdipoCre</sup> mice. MD plot, n=6/group. **D.** Venn diagram showing overlap of differentially-expressed (DE) genes in *Reverba*<sup>Flox2-6 AdipoCre</sup> and *Reverba*<sup>-/-</sup> gWAT. **E.** Pathway analysis of 128 commonly DE genes. Top five (by gene count) significantly enriched Reactome terms shown. **F, G.** Collagen genes are commonly up-regulated in both genotypes (**F**), whilst genes of lipid metabolism are not DE in *Reverba*<sup>Flox2-6 AdipoCre</sup> (**G**). gWAT qPCR, n=6-7/group.

Data presented as mean +/- SEM (**F, G**). \*P<0.05, \*\*P<0.01, unpaired t-tests corrected for multiple comparisons (**F, G**).

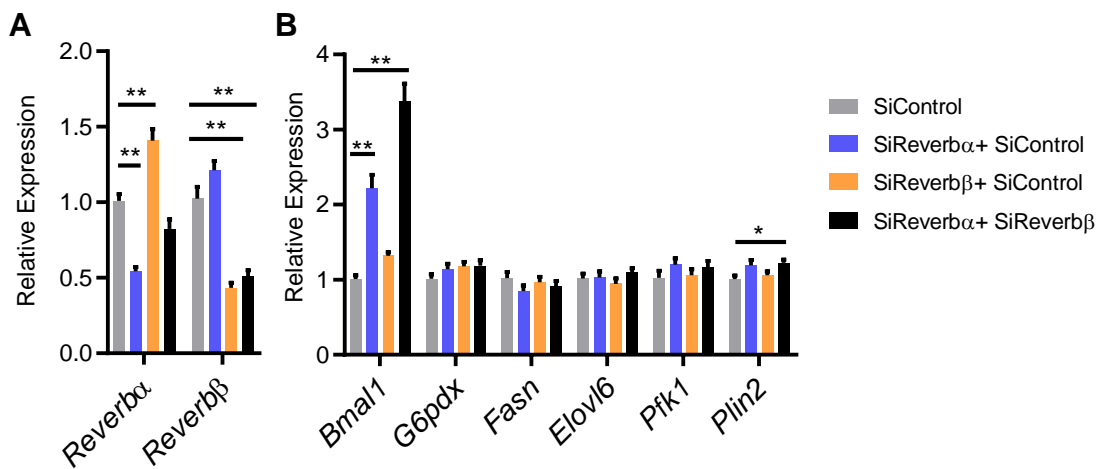

**FIGURE 3 SUPPLEMENTAL. Impact of *Reverba* and *Reverbβ* loss *in vitro*.**

**A, B.** Double knockdown of *Reverba* and *Reverbβ* in differentiated 3T3-L1 cells (**A**) results in marked depression of *Bmal1* expression but minimal effects on expression of typically pro-lipogenic genes (**B**) (data compiled from three replicated knockdown experiments, n=8-9/treatment group).

Data presented as mean +/- SEM. \*P<0.05, \*\*P<0.01, one-way ANOVA with Dunnett's multiple comparisons tests (**A, B**).



208 Thus, whilst global REVERB $\alpha$  targeting produces an adiposity phenotype with up-regulation  
209 of WAT lipogenesis and lipid storage, this is not seen when REVERB $\alpha$  is selectively targeted  
210 in adipose alone. The distinction is not due to loss of *Reverba* expression in brown adipose,  
211 and is not due to compensatory REVERB $\beta$  action. Taken together, our data suggest that under  
212 a basal metabolic state, the adipose transcriptional targets under direct REVERB $\alpha$  control are  
213 in fact limited to core clock function and collagen dynamics. REVERB $\alpha$  is not a major repressor  
214 of lipid metabolism in this setting. This also suggests that the enhanced lipid accumulation  
215 phenotype of *Reverba*<sup>-/-</sup> adipose tissue is either independent from adipose REVERB $\alpha$  entirely,  
216 or that the action of REVERB $\alpha$  in adipose is context-dependent.

217

#### 218 **Diet-induced obesity reveals a broader WAT phenotype in tissue-specific REVERB $\alpha$** 219 **deletion**

220 Studies in liver tissue have demonstrated reprogramming of both nuclear receptor and  
221 circadian clock factor activity by metabolic challenge (Eckel-Mahan et al., 2013; Goldstein et  
222 al., 2017; Guan et al., 2018; Quagliarini et al., 2019). Both our data here, and previous reports  
223 (Delezie et al., 2012; Feng et al., 2011; Hand et al., 2015; Le Martelot et al., 2009; Preitner et  
224 al., 2002), highlight that the normal chow-fed *Reverba*<sup>-/-</sup> mouse is metabolically abnormal. The  
225 emergence of the collagen dynamics as a direct REVERB $\alpha$  target and exaggerated diet-  
226 induced obesity evident in *Reverba*<sup>-/-</sup> mice supports a role for REVERB $\alpha$  in regulating adipose  
227 tissue expansion under obesogenic conditions. To test this, *Reverba*<sup>Flox2-6</sup>*Adipo*<sup>Cre</sup> and  
228 *Reverba*<sup>Flox2-6</sup> mice were provided with HFD for 16 weeks to drive obesity and WAT expansion.  
229 Indeed, compared to their controls, *Reverba*<sup>Flox2-6</sup>*Adipo*<sup>Cre</sup> mice exhibited greater weight gain  
230 and adiposity in response to HFD feeding (**Figure 4A,B**). Of note, divergence between control  
231 and *Reverba*<sup>Flox2-6</sup>*Adipo*<sup>Cre</sup> mice became clear only after long-term HFD-feeding (beyond ~13  
232 weeks), a time at which body weight gain plateaus in control mice. This contrasts substantially  
233 with *Reverba*<sup>-/-</sup> mice, which show rapid and profound weight gain from the start of HFD feeding  
234 (Hand et al., 2015). The stark difference in progression and severity of diet-induced obesity is  
235 likely due (at least in part) to the HFD-induced hyperphagia, which is observed in *Reverba*<sup>-/-</sup>



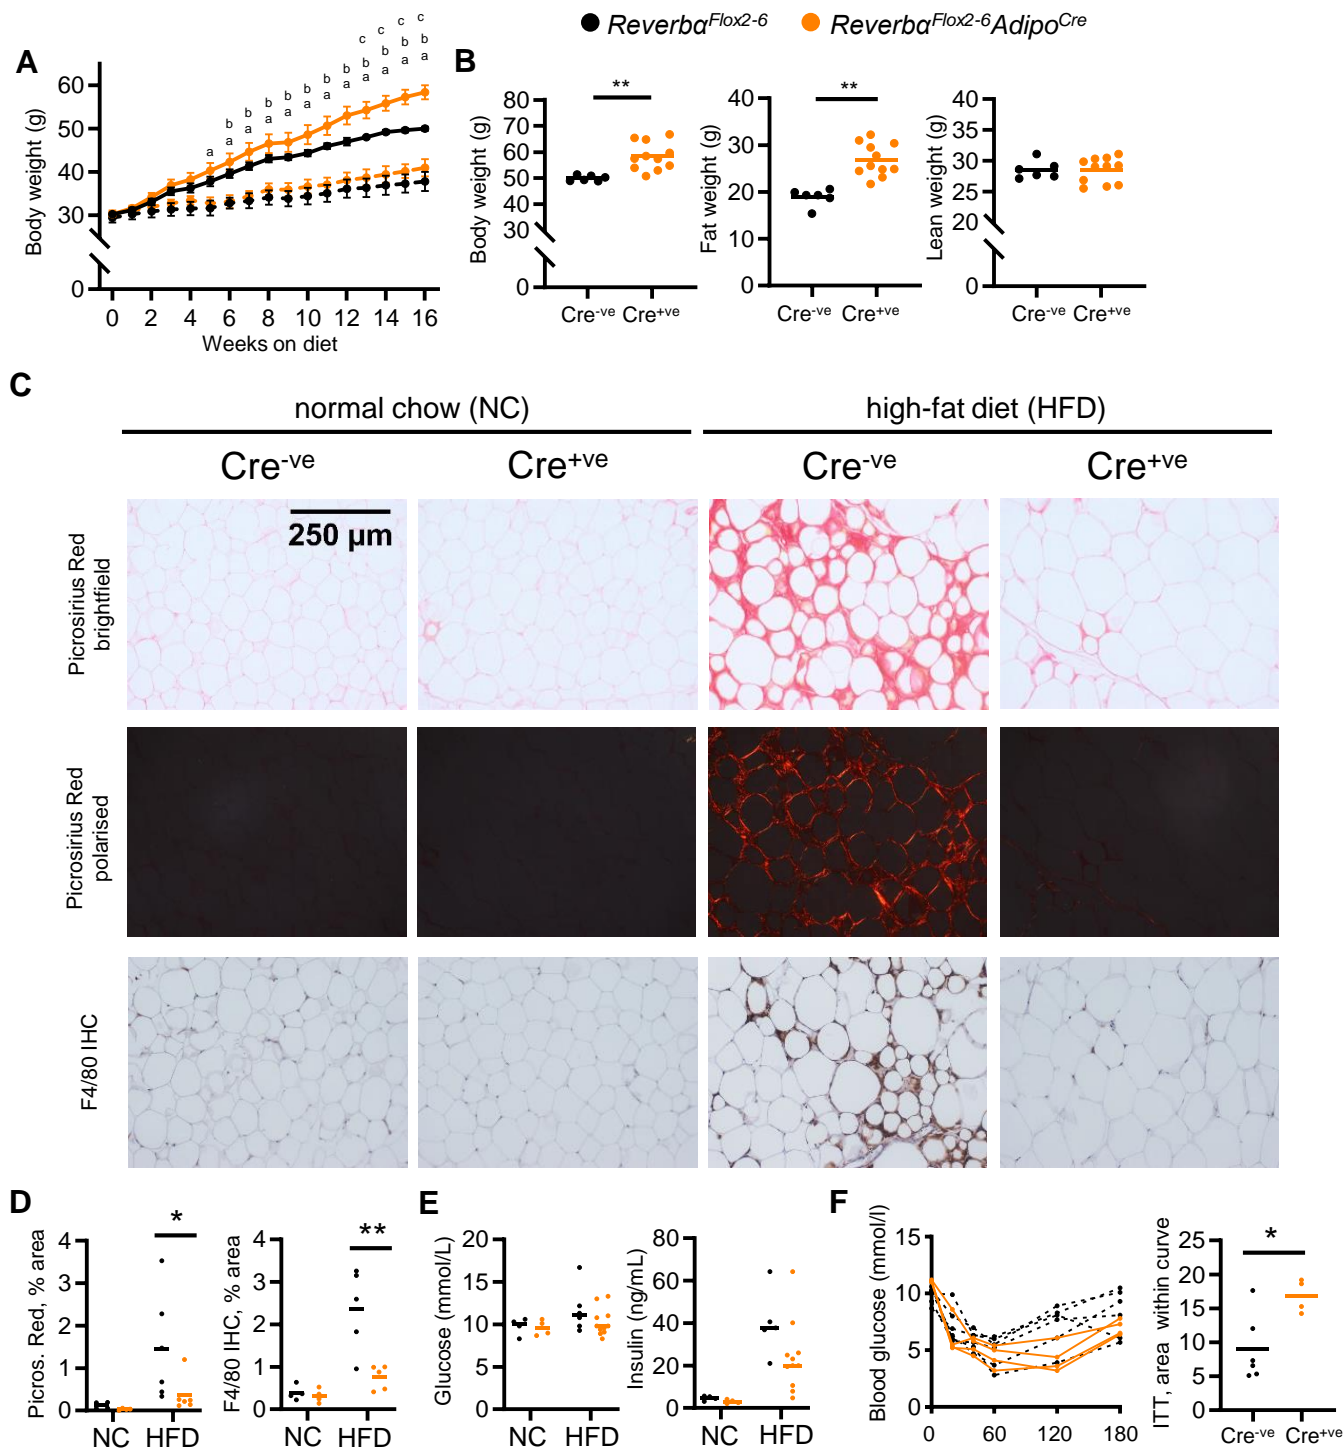

**FIGURE 4. Diet-induced obesity unmasks a role for REVERB $\alpha$  in the regulation of adipose expansion.**

**A, B.** High-fat diet leads to exaggerated adiposity in *Reverba<sup>Flox2-6</sup>Adipo<sup>Cre</sup>* mice. Body weight track of Cre<sup>-ve</sup> and Cre<sup>+ve</sup> male mice on high-fat diet (solid line) or normal chow (dashed line) (**A**) (<sup>a</sup>P<0.05: Cre<sup>+ve</sup> NC vs HFD; <sup>b</sup>P<0.05, Cre<sup>-ve</sup> NC vs HFD; <sup>c</sup>P<0.05, Cre<sup>+ve</sup> HFD vs Cre<sup>-ve</sup> HFD); total body, fat and lean weight after 16 weeks in the high-fat diet group (**B**). **C, D.** On histological examination of WAT, HFD-fed Cre<sup>+ve</sup> mice display less fibrosis and inflammation than Cre<sup>-ve</sup> littermates. Representative Picrosirius Red and F4/80 immunohistochemistry images (x20 magnification) (**C**), quantification of staining across groups, each data point represents the mean value for each individual animal (**D**). **E, F.** Despite increased adiposity, HFD-fed Cre<sup>+ve</sup> mice display greater insulin sensitivity than Cre<sup>-ve</sup> controls. Terminal blood glucose and insulin levels (animals culled 2hrs after food withdrawal) in NC and HFD-fed in *Reverba<sup>Flox2-6</sup>Adipo<sup>Cre</sup>* Cre<sup>-ve</sup> (black) and Cre<sup>+ve</sup> (orange) mice (**E**). Blood glucose values for individual animals and area within curve for 16-week HFD-fed *Reverba<sup>Flox2-6</sup>Adipo<sup>Cre</sup>* Cre<sup>-ve</sup> and Cre<sup>+ve</sup> mice undergoing insulin tolerance testing (ITT) (**F**).

Data presented as mean  $\pm$  SEM (**A**) or as individual data points with mean (**B, D, E, F**). \*P<0.05, \*\*P<0.01, two-way repeated measures ANOVA with Tukey's multiple comparisons tests (**A**), two-way ANOVA with Sidak's multiple comparisons tests (**D, E**), unpaired two-tailed t-test (**B, F**). n=4-11/group for all panels.

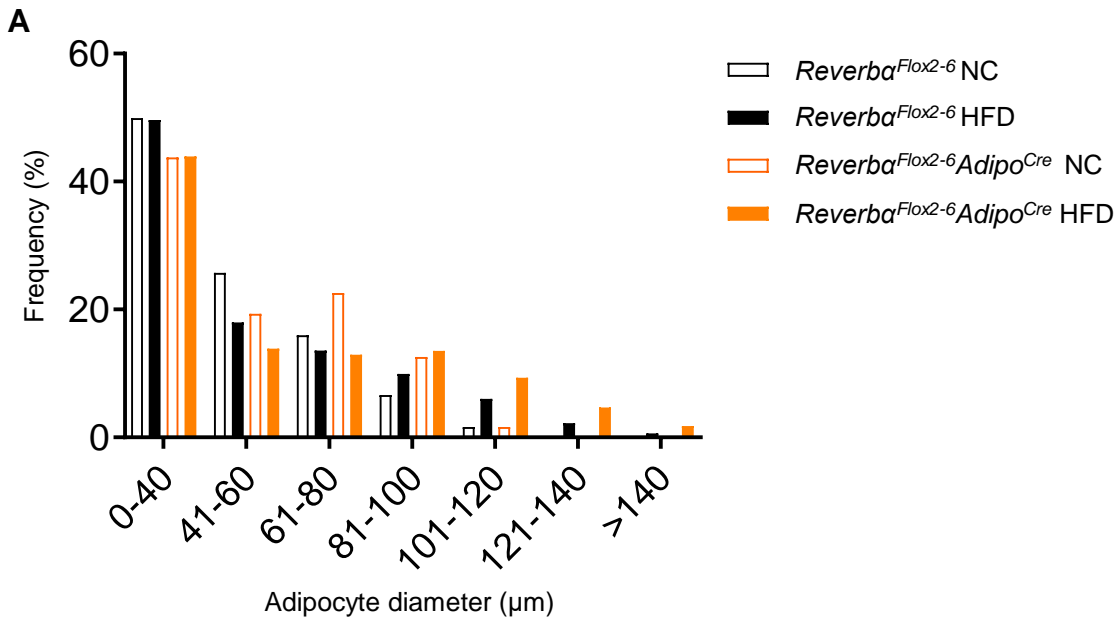

**FIGURE 4 SUPPLEMENTAL. Adipocyte size in *Reverba<sup>Flox2-6</sup>* and *Reverba<sup>Flox2-6</sup>Adipo<sup>Cre</sup>* mice .**

**A.** Quantification of WAT adipocyte size in NC- and HFD-fed *Reverba<sup>Flox2-6</sup>* and *Reverba<sup>Flox2-6</sup>Adipo<sup>Cre</sup>* mice demonstrates no between-genotype differences in size distribution. n=4-6/group.

Data presented as mean. Two-way ANOVA with Tukey's multiple comparisons tests.

236 mice (WT food intake  $2.92 \pm 0.10$ g HFD/day/mouse; KO  $3.74 \pm 0.21$ g,  $P=0.0014$ , Student's T-  
237 test,  $n=21$ /genotype), but not in *Reverba*<sup>Flox2-6</sup>*Adipo*<sup>Cre</sup> mice (*Cre*<sup>-ve</sup>  $2.99 \pm 0.61$ g  
238 HFD/day/mouse; *Cre*<sup>+ve</sup>  $3.01 \pm 0.60$ g,  $P>0.05$ ,  $n=8$ /genotype). Nevertheless, both models  
239 highlight that loss of REVERBa increases capacity for increased lipid storage and adipose  
240 tissue expansion under obesogenic conditions.

241

242 Despite the enhanced diet-induced obesity, HFD-fed *Reverba*<sup>Flox2-6</sup>*Adipo*<sup>Cre</sup> mice showed little  
243 evidence of typical obesity-related pathology. Histological assessment of gWAT after 16-  
244 weeks of HFD feeding revealed widespread adipose tissue fibrosis (Picrosirius Red staining  
245 of collagen deposition under normal and polarised light) and macrophage infiltration (F4/80  
246 immunohistochemistry) in obese control mice, but these features were not seen in  
247 *Reverba*<sup>Flox2-6</sup>*Adipo*<sup>Cre</sup> mice (**Figure 4C,D**). Furthermore, we saw evidence of preserved insulin  
248 sensitivity in the HFD-fed *Reverba*<sup>Flox2-6</sup>*Adipo*<sup>Cre</sup> mice, with neither circulating glucose nor  
249 insulin being higher than *Reverba*<sup>Flox2-6</sup> littermate controls (**Figure 4E**), despite carrying  
250 significantly greater fat mass. Indeed, on insulin tolerance testing, HFD-fed *Reverba*<sup>Flox2-  
251 6</sup>*Adipo*<sup>Cre</sup> mice demonstrated more marked hypoglycaemia than HFD-fed controls (**Figure 4F**).  
252 We saw no differences in adipocyte size between the two genotypes, indicating that our  
253 observations did not simply reflect greater adipocyte hyperplasia in the *Reverba*<sup>Flox2-6</sup>*Adipo*<sup>Cre</sup>  
254 mice (**Figure 4 Supplemental A**).

255

256 Therefore, under long-term HFD-feeding conditions, adipose-targeted *Reverba* deletion  
257 results in continued adipose tissue expansion accompanied by a healthier metabolic  
258 phenotype with reduced adipose inflammation and fibrosis, and preserved systemic insulin  
259 sensitivity. Importantly, these findings also suggest that the regulatory influence of REVERBa  
260 is context-dependent, with the metabolic impact of adipose-targeted *Reverba* deletion  
261 revealed by transition to an obese state.

262

263 **REVERBa-dependent gene regulation is reprogrammed by obesity**

264 We next performed RNA-seq on gWAT collected at ZT8 from *Reverba*<sup>Flox2-6</sup>*Adipo*<sup>Cre</sup> and  
265 *Reverba*<sup>Flox2-6</sup> littermate controls fed either normal chow (NC) or HFD for 16 weeks (NC,  
266 n=4/group; HFD, n=6/group). As expected, HFD-feeding had a substantial impact on the gWAT  
267 transcriptome in both Cre<sup>-ve</sup> and Cre<sup>+ve</sup> animals (i.e. NC vs HFD comparison within each  
268 genotype; **Figure 5A**). Under NC feeding conditions, we again observed only a small genotype  
269 effect on the transcriptome, and as before, differentially-expressed genes included core clock  
270 genes (*Bmal1*, *Nfil3*, *Npas2*, *Clock*) and those of collagen synthesis pathways (**Figure 5B**).  
271 However, obesity revealed a substantial genotype effect, with 3061 genes differentially  
272 expressed (1706 up, 1355 down) in HFD-fed *Reverba*<sup>Flox2-6</sup>*Adipo*<sup>Cre</sup> mice versus HFD-fed  
273 *Reverba*<sup>Flox2-6</sup> controls (**Figure 5B**), and 1704 genes showing a significant ( $\alpha < 0.05$ ) diet-  
274 genotype interaction (stageR specific interaction analysis; Van den Berge et al., 2017). Of  
275 these 1704 genes, those up-regulated in obese *Reverba*-deficient adipose were strongly  
276 enriched for metabolic pathways, whilst down-regulated genes showed weak enrichment of  
277 ECM organisation processes (**Figure 5C**). To examine how loss of *Reverba* alters adipose  
278 tissue response to diet-induced obesity, we compared directly those processes which showed  
279 significant obesity-related dysregulation in control mice (**Figure 5D**). While HFD-feeding  
280 caused a profound down-regulation (vs NC conditions) of metabolic pathways in the WAT of  
281 control mice, this was not observed in *Reverba*<sup>Flox2-6</sup>*Adipo*<sup>Cre</sup> mice. By contrast, HFD-feeding  
282 led to an up-regulation of immune pathways in both genotypes (**Figure 5D**). Thus,  
283 transcriptomic profiling correlates with phenotype in suggesting that WAT function and  
284 metabolic activity is protected from obesity-related dysfunction in the *Reverba*<sup>Flox2-6</sup>*Adipo*<sup>Cre</sup>  
285 mice, and that the impact of adipose *Reverba* deletion is dependent on system-wide metabolic  
286 state.

287

## 288 **Integration of differential gene expression with the WAT cistrome reveals state-** 289 **dependent regulation of metabolic targets by REVERB $\alpha$**

290 To examine the mechanism of REVERB $\alpha$  regulation of the WAT metabolic programme in HFD-  
291 fed mice, we analysed the relationship between differentially expressed genes revealed by

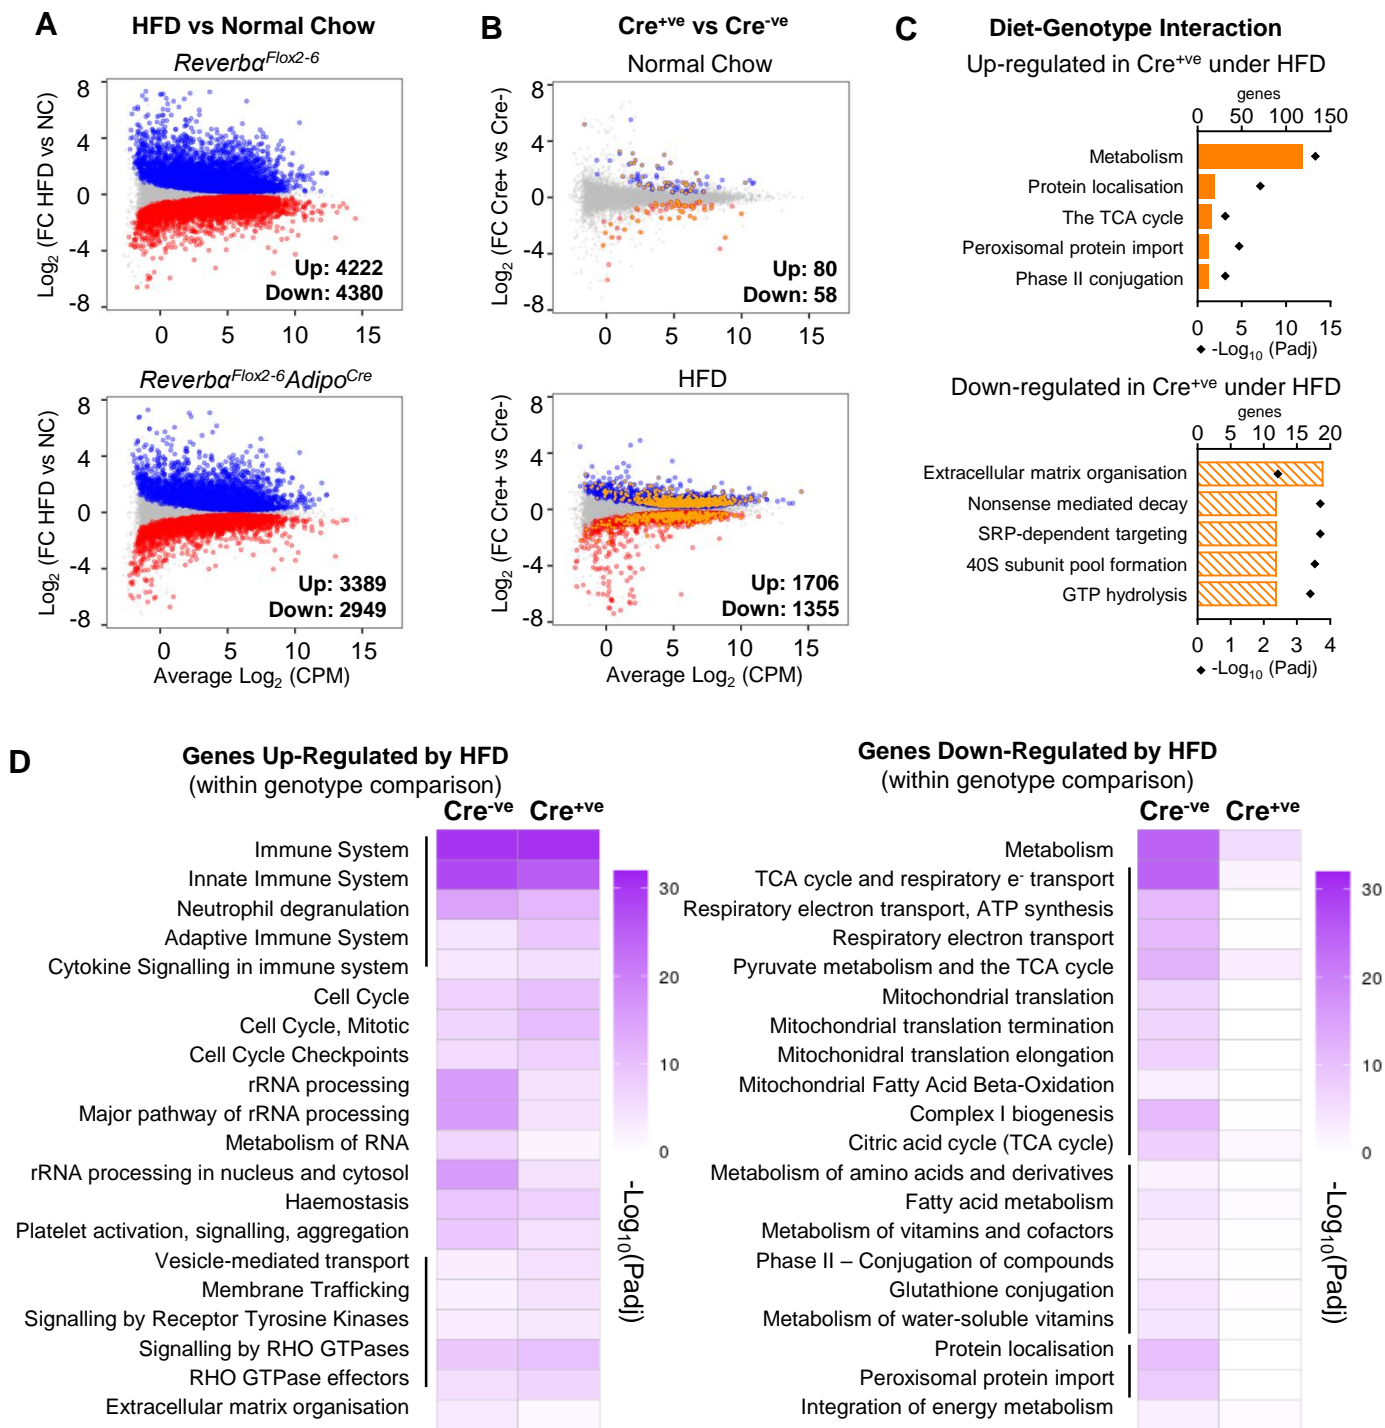

**FIGURE 5. Under conditions of obesity, REVERB $\alpha$  repression extends to metabolic pathways.**

**A.** High-fat diet dramatically remodels the WAT transcriptome. RNA-seq ( $n=4-6$ /group) was performed in gWAT from Cre<sup>-ve</sup> and Cre<sup>+ve</sup> male mice fed normal chow (NC) or high-fat diet (HFD) for 16 weeks. MD plots show genes significantly ( $FDR<0.05$ ) up-regulated (blue) or down-regulated (red) by HFD in each genotype. **B.** With HFD, the REVERB $\alpha$ -responsive gWAT transcriptome broadens. MD plots show effect of genotype in NC (top panel) and HFD (lower panel) feeding conditions. Genes where stageR detects a significant ( $\alpha=0.05$ ) genotype-diet interaction highlighted in orange. **C.** Reactome pathway analysis of genes up- or down-regulated in Cre<sup>+ve</sup> gWAT under HFD conditions, where this diet-genotype interaction is also detected. Top five (by gene count) significantly enriched terms shown. **D.** Adipose-targeted deletion of *Reverba* attenuates the normal HFD-induced down-regulation of metabolic pathways. Heatmaps show enrichment ( $-\log_{10}(\text{Padj})$ ) of Reactome pathways in genes up-regulated (left) or down-regulated (right) by HFD feeding in Cre<sup>-ve</sup> and Cre<sup>+ve</sup> gWAT. Top twenty (by gene count in Cre<sup>-ve</sup> group) significantly enriched terms shown.

292 our RNA-seq studies and the WAT REVERB $\alpha$  cistrome. We identified primary REVERB $\alpha$   
293 target genes by comparing genes changing in *Reverba*<sup>Flox2-6</sup>*Adipo*<sup>Cre</sup> gWAT (relative to control  
294 mice, under both NC and HFD conditions) with genes changing in *Reverba*<sup>-/-</sup> gWAT. To define  
295 the cistrome, we used raw published gWAT ChIP-seq data (Zhang et al., 2015) to call 2,354  
296 high-stringency REVERB $\alpha$  peaks. To infer which genes might be direct targets of REVERB $\alpha$   
297 repression, we employed a custom Python script that calculates the enrichment of differentially  
298 expressed gene sets in spatial relation to identified transcription factor binding sites (**Figure 6**  
299 **Supplemental A**) (Hunter et al., 2020; Yang et al., 2019), over all genes in the genome.

300

301 Under NC conditions, only small sets of genes were up- or down-regulated in both  
302 *Reverba*<sup>Flox2-6</sup>*Adipo*<sup>Cre</sup> and *Reverba*<sup>-/-</sup> tissues (versus their respective controls) (**Figure**  
303 **6A(i,ii)**). Nevertheless, genes up-regulated in *Reverba*<sup>Flox2-6</sup>*Adipo*<sup>Cre</sup> and *Reverba*<sup>-/-</sup> gWAT  
304 were significantly enriched around REVERB $\alpha$  ChIP-seq peaks at distances up to 1Mbp  
305 (**Figure 6A(i)**), consistent with repression mediated directly by DNA-bound REVERB $\alpha$ . Of  
306 these genes, 61.8% were within 100kbp of a stringent REVERB $\alpha$  peak, strongly suggesting  
307 that this gene cluster (clock and collagen genes) represents direct targets of REVERB $\alpha$   
308 repression in WAT under NC conditions. Genes up-regulated only in *Reverba*<sup>-/-</sup> WAT were also  
309 enriched around REVERB $\alpha$  peaks (at distances of up to 500kbp) suggesting that at least a  
310 proportion of these genes are presumptive direct targets of REVERB $\alpha$  regulation. In contrast,  
311 no enrichment of genes with decreased expression in *Reverba*<sup>Flox2-6</sup>*Adipo*<sup>Cre</sup> or *Reverba*<sup>-/-</sup> WAT  
312 was evident at any distance from REVERB $\alpha$  peaks (**Figure 6A(ii)**). Thus, REVERB $\alpha$  activation  
313 of transcription involves a different mechanism of regulation, likely involving secondary or  
314 indirect mechanisms (e.g. de-repression of another repressor), as previously proposed to  
315 explain REVERB $\alpha$  transactivation (Le Martelot et al., 2009).

316

317 HFD-feeding of *Reverba*<sup>Flox2-6</sup>*Adipo*<sup>Cre</sup> mice greatly increased the overlap of differentially-  
318 expressed genes with those differentially expressed in *Reverba*<sup>-/-</sup> WAT. (**Figure 6A(iii,iv)**). We  
319 observed a highly significant proximity enrichment of these commonly up-regulated genes



320 (863) to sites of REVERB $\alpha$  chromatin binding (**Figure 6A(iii)**), but again, saw no enrichment  
321 of the commonly down-regulated genes (**Figure 6A(iv)**). This integration of transcriptome and  
322 cistrome profiling suggests that REVERB $\alpha$ 's exertion of direct repressive control over gene  
323 targets is dependent on metabolic state, and increases substantially under HFD-feeding  
324 conditions. Of note, the 1714 genes up-regulated only in the *Reverba*<sup>-/-</sup> WAT retained some  
325 proximity enrichment to REVERB $\alpha$  binding sites. This suggests that some of these genes are  
326 direct REVERB $\alpha$  targets but subject to additional transcriptional controls.

327

328 Consistent with the healthier metabolic phenotype and transcriptome changes observed in  
329 obese *Reverba*<sup>Flox2-6</sup>*Adipo*<sup>Cre</sup> mice, we found that the large majority of the 863 REVERB $\alpha$  gene  
330 targets unmasked by HFD-feeding are normally repressed in obesity (**Figure 6B**), with 551  
331 (63.8%) being significantly down-regulated in obese control (Cre<sup>-ve</sup>) animals. These genes  
332 include important regulators of lipid and mitochondrial metabolism (**Figure 6C**) - including  
333 *Fasn*, *Scd1*, *Dgat2*, *Cs* - and FGF-21 co-receptor *Klb*, a previously-identified REVERB $\alpha$  target  
334 gene (Jager et al., 2016). Considered together, these findings suggest that the healthy  
335 adiposity phenotype in HFD-fed *Reverba*<sup>Flox2-6</sup>*Adipo*<sup>Cre</sup> mice results from de-repression of  
336 REVERB $\alpha$ -controlled pathways allowing continued and efficient lipid synthesis and storage,  
337 thus permitting greater expansion of the adipose bed and attenuation of obesity-related  
338 dysfunction.

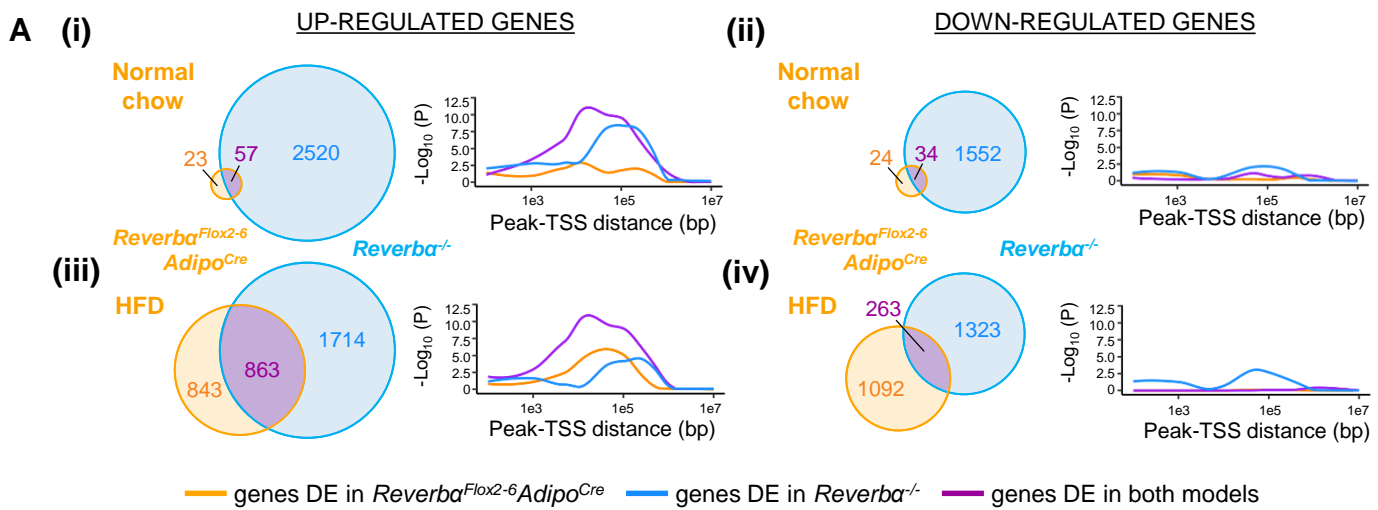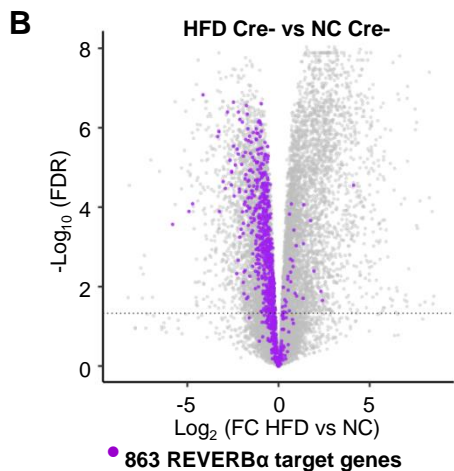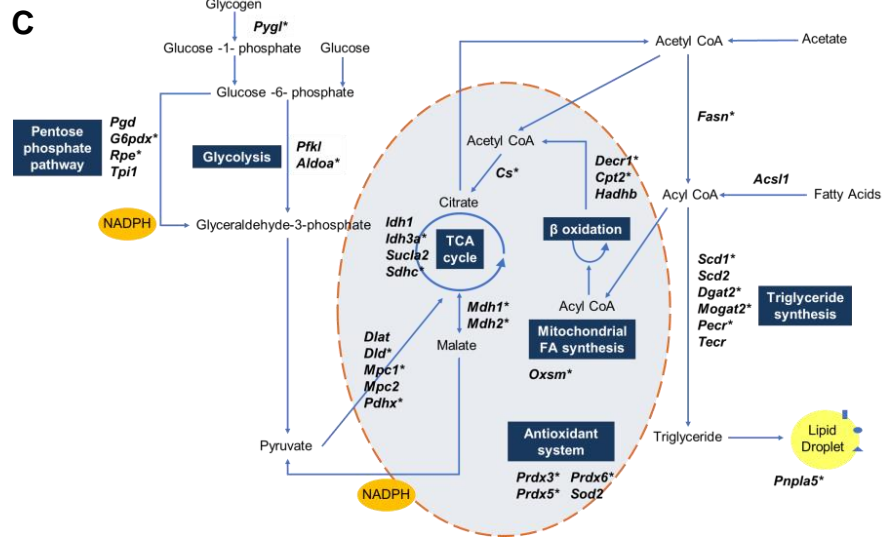

**FIGURE 6. REVERB $\alpha$ -regulated targets, unmasked by obesity, associate with gWAT REVERB $\alpha$  binding sites.**

**A.** Genes commonly up-regulated by *Reverba* loss, in both the basal and obese state, show the strongest association with gWAT REVERB $\alpha$  ChIP-seq peaks. Venn diagrams show overlap of differentially-expressed (DE) genes in *Reverba<sup>Flox2-6</sup>Adipo<sup>Cre</sup>* Cre<sup>+/ve</sup> mice (under NC (i, ii) and HFD (iii, iv) conditions) with differentially-expressed genes in *Reverba<sup>-/-</sup>* mice (each compared to their respective controls). Plots show  $-\log_{10}(\text{P-value for enrichment})$  for each gene cluster at increasing distances from stringent REVERB $\alpha$  gWAT ChIP-seq peaks ( $\text{FE} > 7.5$  over input). See Figure 6 Supplemental (A) for schematic. DE genes separated by direction of regulation (up or down). **B, C.** REVERB $\alpha$  targets are also down-regulated in obesity, and include important lipid and mitochondrial metabolic regulators. Volcano plot (**B**) highlighting effect of HFD (in intact (Cre<sup>-ve</sup>) animals) of the 863 REVERB $\alpha$  target genes from **A(iii)**. Metabolic map illustrating REVERB $\alpha$  targets (**C**). Genes showing significantly down-regulation by HFD (in Cre<sup>-ve</sup> animals) are starred\*.



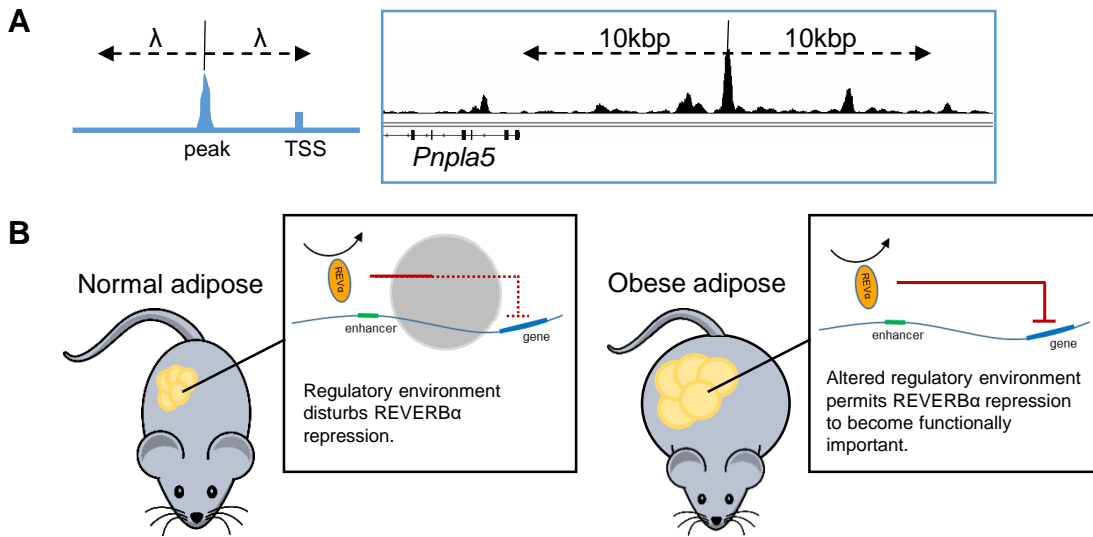

**FIGURE 6 SUPPLEMENTAL. Relationship between REVERB $\alpha$  binding sites and gene regulation.**

**A.** Schematic of peaks-genes analysis. ChIP-seq peaks are extended by user-specified distances ( $\lambda$ ) either side of the peak centre. Enrichment of the genes of interest, within all genes whose transcription start site (TSS) is detected within  $\lambda$ , is assessed by a hypergeometric test. The TSS of *Pnpla5*, for example, lies within 10kbp of a REVERB $\alpha$  ChIP-seq peak. **B.** Proposed model. In normal conditions, there is a large number of genes over which REVERB $\alpha$  repressive control is not apparent, likely because the regulatory environment (chromatin state, presence of other regulators) blocks this interaction or renders it redundant. In obese adipose, alterations to the regulatory environment (e.g. chromatin remodelling) are permissive to REVERB $\alpha$  activity.

338 **DISCUSSION**

339

340 We set out to define the role of REVERB $\alpha$  in the regulation of white adipose tissue metabolism,  
341 and subsequently reveal a new understanding of REVERB $\alpha$  function. Together, our data show  
342 REVERB $\alpha$  to be a state-dependent regulator of WAT metabolism, with its widespread  
343 repressive action only unmasked by diet-induced obesity. Surprisingly, *Reverba* expression in  
344 WAT appears to limit the energy buffering function of the tissue. This finding parallels our  
345 recent work in the liver (Hunter et al., 2020). Hepatic-selective loss of REVERB $\alpha$  carries no  
346 metabolic consequence, with REVERB $\alpha$ -dependent control over hepatic energy metabolism  
347 revealed only upon altered feeding conditions. Contrary to current understanding, our findings  
348 therefore suggest that REVERB $\alpha$  (and potentially other components of the peripheral clock)  
349 does not impose rhythmic repression of metabolic circuits under basal conditions, but rather  
350 determines tissue responses to altered metabolic state.

351

352 As reported previously by us and others (Delezie et al., 2012; Hand et al., 2015), global  
353 deletion of *Reverba* leads to an increase in lipogenesis, adipose tissue expansion, and an  
354 exaggerated response to diet-induced obesity. How the loss of REVERB $\alpha$  specifically in WAT  
355 contributes to this phenotype has not previously been addressed. Here, we use proteomic,  
356 transcriptomic and lipid profiling studies to show a clear bias towards fatty acid synthesis and  
357 triglyceride storage within *Reverba*<sup>-/-</sup> WAT. Adipocyte-targeted deletion of *Reverba* reveals only  
358 a modest phenotype, and a relatively selective set of gene targets, limited to clock processes  
359 and collagen dynamics. These genes are concurrently de-regulated in *Reverba*<sup>-/-</sup> adipose, and  
360 are found in proximity to REVERB $\alpha$  binding sites, strongly implicating them as direct targets  
361 of REVERB $\alpha$  repressive activity.

362

363 The reduced inflammation seen in obese *Reverba*<sup>Flox2-6</sup>*Adipo*<sup>Cre</sup> mice is likely multifactorial, but  
364 may be secondary to a reduction in the pro-inflammatory free fatty acid pool, resulting from  
365 de-repression of lipogenic and mitochondrial metabolism pathways, or the absence of signals

366 from dead/dying adipocytes. It is of note that improved metabolic flexibility is proposed to be  
367 beneficial in other mouse models of metabolic disease (Jonker et al., 2012; Kim et al., 2007;  
368 Virtue et al., 2018) and in human obesity (Aucouturier et al., 2011; Begaye et al., 2020). We  
369 identify extracellular matrix as a new direct target of adipose REVERB $\alpha$  action; altered  
370 regulation of WAT collagen production and modification is also likely to contribute to the rapid  
371 and continued adipose tissue expansion and reduced obesity-related fibrosis. The clock has  
372 been linked to ECM re-modelling in other tissues (Chang et al., 2020; Dudek et al., 2015;  
373 Sherratt et al., 2019), where it is thought to coordinate ECM dynamics, collagen turnover and  
374 secretory processes (Chang et al., 2020). Adipose-specific deletion of *Reverba* now provides  
375 a unique model to explore the complex ECM responses which accompany obesity-related  
376 tissue hypertrophy and development of fibrosis.

377

378 A role for the clock in the regulation of WAT function has been reported in the literature  
379 (Barnea et al., 2015; Paschos et al., 2012; Shostak et al., 2013), perhaps implying that it is  
380 the rhythmicity conferred by the clock which is important for WAT metabolism. However,  
381 despite robust rhythms of clock genes persisting, rhythmic gene expression in gWAT is largely  
382 attenuated following genetic disruption of SCN function (Kolbe et al., 2016). This supports the  
383 alternative notion that an intact local clock is not the primary driver of rhythmic peripheral tissue  
384 metabolism. Indeed, metabolic processes, including lipid biosynthesis, were highly enriched  
385 in the cohort of SCN-dependent rhythmic genes from this study (Kolbe et al., 2016), implying  
386 that feeding behaviour and WAT responses to energy flux are more important than locally-  
387 generated rhythmicity for adipose function.

388

389 The modest impact of adipose-selective *Reverba* deletion is both at odds with the large effect  
390 of global *Reverba* deletion, and with the extensive WAT cistrome identified for REVERB $\alpha$   
391 (even by stringent peak calling as we have done here). This suggests that the tissue-specific  
392 actions of REVERB $\alpha$  are necessary, but not sufficient, and require additional regulation from  
393 the metabolic state. Although not explored to the same extent, a lipogenic phenotype of liver-

394 specific ROR $\alpha$ / $\gamma$  deletion has previously been shown to be unmasked by HFD-feeding (Zhang  
395 et al., 2017). By driving adipose tissue hypertrophy through HFD-feeding of the *Reverba*<sup>Flox2-</sup>  
396 <sup>6</sup>*Adipo*<sup>Cre</sup> mice, we observed a stark difference in the adipose phenotype of targeted mice and  
397 littermate controls. WAT tissue lacking *Reverba* showed significantly increased tissue  
398 expansion, but little evidence of normal obesity-related pathology (tissue fibrosis, and immune  
399 cell infiltration/inflammation). Genes controlling mitochondrial activity, lipogenesis and lipid  
400 storage were relatively spared from the obesity-related down-regulation observed in control  
401 mouse tissue, and were associated with the WAT REVERB $\alpha$  cistrome. Thus, in response to  
402 HFD-feeding, REVERB $\alpha$  acts to repress metabolic activity in the adipocyte and limit tissue  
403 expansion (albeit at the eventual cost of tissue dysfunction, inflammation and development of  
404 adipose fibrosis).

405

406 The broadening of REVERB $\alpha$ 's regulatory influence in response to obesity likely reflects a  
407 change to the chromatin environment in which REVERB $\alpha$  operates (**Figure 6 Supplementary**  
408 **B**). The majority of emergent REVERB $\alpha$  target genes are repressed in obese adipose when  
409 *Reverba* expression is intact (**Figure 6B**). As these genes are not de-repressed by *Reverba*  
410 loss in normal adipose, REVERB $\alpha$  activity must be redundant or ineffective in a 'basal'  
411 metabolic state. Subsequent emergence of REVERB $\alpha$ 's transcriptional control may reflect  
412 alterations in chromatin accessibility or organisation, and/or the presence of transcriptional  
413 repressors and accessory factors required for full activity. As REVERB $\alpha$  is itself proposed to  
414 regulate enhancer-promoter loop formation (Kim et al., 2018), modulation of *Reverba*  
415 expression would be a further important variable here. Such reshaping of the regulatory  
416 landscape likely occurs across tissues, and may explain why, with metabolic challenge,  
417 emergent circadian rhythmicity is observed in gene expression (Eckel-Mahan et al., 2013;  
418 Kinouchi et al., 2018; Tognini et al., 2017), and in circulating and tissue metabolites (Dyar et  
419 al., 2018; Eckel-Mahan et al., 2013).

420

421 Here, we now uncover a role for REVERB $\alpha$  in limiting the energy-buffering role of WAT, a  
422 discovery which may present therapeutic opportunity as we cope with an epidemic of human  
423 obesity. Despite recent findings which have cast doubt on the utility of some of the small  
424 molecule REVERB $\alpha$  ligands (Dierickx et al., 2019), antagonising WAT REVERB $\alpha$  now  
425 emerges as a potential target in metabolic disease. Finally, our study suggests that a  
426 functioning circadian clock may be beneficial in coping with acute mistimed metabolic cues  
427 but, that under chronic energy excess, may contribute to metabolic dysfunction and obesity-  
428 related pathology.  
429

## 430 MATERIALS AND METHODS

431

432 **Animal experiments.** All experiments described here were conducted in accordance with  
433 local requirements and licenced under the UK Animals (Scientific Procedures) Act 1986,  
434 project licence number 70/8558 (DAB). Procedures were approved by the University of  
435 Manchester Animal Welfare and Ethical Review Body (AWERB). Unless otherwise specified,  
436 all animals had *ad libitum* access to standard laboratory chow and water, and were group-  
437 housed on 12hour:12hour light:dark (LD) cycles and ambient temperature of 22°C±1.5°C.  
438 Male mice (*Mus musculus*) were used for all experimental procedures. All proteomics studies  
439 were carried out on 13-week-old weight matched males. RNA-seq studies for Figure 3 were  
440 carried out on 12-14 week-old weight-matched males; the RNA-seq study for Figure 5 was  
441 carried out on 28 week-old males (following 16 weeks of high-fat diet or normal chow feeding).

442

### 443 ***Reverba*<sup>-/-</sup>**

444 *Reverba*<sup>-/-</sup> mice were originally generated by Ueli Schibler (University of Geneva) (Preitner et  
445 al., 2002). These mice were created by replacing exons 2-5 of the *Reverba* gene by an in-  
446 frame LacZ allele. Mice were then imported to the University of Manchester and backcrossed  
447 to C57BL/6J mice.

448

### 449 ***Reverba*<sup>Flox2-6</sup>**

450 A CRISPR-Cas9 approach was used to generate a conditional knock allele for *Nr1d1*  
451 (*Reverba*), as described (Hunter et al., 2020). LoxP sites were integrated, in a two-step  
452 process, at intron 2 and intron 6, taking care to avoid any previously described transcriptional  
453 regulatory sites (Yamamoto et al., 2004). A founder animal with successful integration of both  
454 the 5' and 3' loxP sites, transmitting to the germline, was identified and bred forward to  
455 establish a colony.

456

### 457 ***Reverba*<sup>Flox2-6</sup>*Adipo*<sup>Cre</sup>**

458 *Adiponectin*-driven Cre-recombinase mice (Eguchi et al., 2011; Jeffery et al., 2014) were  
459 purchased from The Jackson Laboratory and subsequently bred against the *Reverba*<sup>Flox2-6</sup> at  
460 the University of Manchester.

461

462 **In vivo phenotyping.** Body composition of mice was analysed prior to cull by quantitative  
463 magnetic resonance (EchoMRI 900). Energy expenditure was measured via indirect  
464 calorimetry using CLAMS (Columbus Instruments) for 10-12 week old male mice. Mice were  
465 allowed to acclimatise to the cages for two days, prior to an average of 5 days of recordings  
466 being collected. Recording of body temperature and activity was carried out via surgically  
467 implanted radiotelemetry devices (TA-F10, Data Sciences International). Data is shown as a  
468 representative day average of single- housed age-matched males. For the diet challenge,  
469 male mice were fed high-fat diet (HFD; 60% energy from fat; DIO Rodent Purified Diet, IPS  
470 Ltd) for a period of 10-16 weeks from 12 weeks of age. Blood glucose was measured from tail  
471 blood using the Aviva Accucheck meter (Roche). For the insulin tolerance test, mice were fasted  
472 from ZT0, then injected with 0.75 IU/kg human recombinant insulin (I2643, Sigma Aldrich) at  
473 ZT6 (time “0 minutes”).

474

475 **Insulin ELISA.** Insulin concentrations were measured by ELISA (EZRMI-13K Rat/Mouse  
476 insulin ELISA, Merck Millipore) according to the manufacturer’s instructions. Samples were  
477 diluted in matrix solution to fall within the range of the assay. Internal controls supplied with  
478 the kit were run alongside the samples and were in the expected range.

479

480 **Histology.** gWAT was collected and immediately fixed in 4% paraformaldehyde for 24 hours,  
481 transferred into 70% ethanol, and processed using a Leica ASP300 S tissue processor. 5µm  
482 sections underwent H&E staining (Alcoholic Eosin Y solution (HT110116) and Harris  
483 Haematoxylin solution (HHS16), Sigma Aldrich), Picrosirius Red staining (see below), or F4/80  
484 immunohistochemistry (see below), prior to imaging using a Snapshots Olympus single slide  
485 scanner at 10x or 20x objective magnification alongside Olympus cellSens Dimension

486 software (version 1.18). Percentage area stained was quantified using ImageJ (version 1.52a)  
487 as detailed in the online ImageJ documentation  
488 (<https://imagej.nih.gov/ij/docs/examples/stained-sections/index.html>), with 5-12 images  
489 quantified per animal. Adipocyte area was quantified using the Adiposoft ImageJ plug-in  
490 (version 1.16 - <https://imagej.net/Adiposoft>).

491

492 For Picosirius Red staining, sections were dewaxed and rehydrated using the Leica ST5010  
493 Autostainer XL. Sections were washed in distilled water and then transferred to Picosirius  
494 Red (Direct Red 80, Sigma Aldrich) (without the counterstain) for 1 hour. Sections were then  
495 washed briefly in 1% acetic acid. Sections were then dehydrated, cleared and mounted using  
496 the Leica ST5010 Autostainer XL.

497

498 For F4/80 immunohistochemistry, sections were dewaxed and rehydrated prior to enzymatic  
499 antigen retrieval (trypsin from porcine pancreas (T7168, Sigma)). Sections were treated with  
500 3% hydrogen peroxide to block endogenous peroxidase activity followed by further blocking  
501 with 5% goat serum. Rat mAb to F4/80 (1:500) (ab6640, Abcam) was added and sections  
502 were incubated overnight at 4°C. Sections were washed before addition of the biotinylated  
503 anti-rat IgG (BA-9400, H&L) secondary antibody (1:1500) for 1 hour. Sections were developed  
504 using VECTAstain® Elite® ABC kit peroxidase, followed by DAB Peroxidase substrate (Vector  
505 Labs) and counterstained with haematoxylin. Slides were then dehydrated, cleared and  
506 mounted.

507

508 **Lipid extraction and gas chromatography.** Total lipid was extracted from tissue lysates  
509 using chloroform-methanol (2:1; v/v) according to the Folch method (Folch et al., 1957). An  
510 internal standard (tripentadecanoin glycerol (15:0)) of known concentration of was added to  
511 samples for quantification of total triacylglyceride. Lipid fractions were separated by solid-  
512 phase extraction and fatty acid methyl esters (FAMES) were prepared as previously described  
513 (Heath et al., 2003). Separation and detection of total triglyceride FAMES was achieved using



514 a 6890N Network GC System (Agilent Technologies; CA, USA) with flame ionization detection.  
515 FAMES were identified by their retention times compared to a standard containing 31 known  
516 fatty acids and quantified in micromolar from the peak area based on their molecular weight.  
517 The micromolar quantities were then totalled and each fatty acid was expressed as a  
518 percentage of this value (molar percentage; mol%).

519

520 **Proteomics.** Mice were culled by cervical dislocation and the gWAT was immediately removed  
521 and washed twice in ice-cold PBS and then once in ice-cold 0.25M sucrose, prior to samples  
522 being snap-frozen in liquid nitrogen and stored at -80°C. To extract the protein, the samples  
523 were briefly defrosted on ice and then cut into 50mg pieces and washed again in ice-cold PBS.  
524 The sample was then lysed in 200µl of 1M Triethylammonium bicarbonate buffer (TEAB;  
525 Sigma) with 0.1% (w/v) sodium dodecyl sulphate (SDS) with a Tissue Ruptor (Qiagen).  
526 Samples were centrifuged for 5 minutes, full speed, at 4°C and the supernatant collected into  
527 a clean tube. A Biorad protein assay (Biorad) was used to quantify the protein and Coomassie  
528 protein stain (InstantBlue™ Protein Stain Instant Blue, Expedeon) to check the quality of  
529 extraction. Full methods of subsequent iTRAQ proteomic analysis including bioinformatic  
530 analysis has been published previously (Xu et al., 2019). Here the raw data was searched  
531 against the mouse Swissprot database (release October 2017) using the paragon algorithm  
532 on Protein-Pilot (Version 5.0.1, AB SCIEX). A total of 33847 proteins were searched. As  
533 described (Xu et al., 2019), Bayesian protein-level differential quantification was performed by  
534 Andrew Dowsey (University of Bristol) using their own BayesProt (version 1.0.0), with default  
535 choice of priors and MCMC settings. Expression fold change relative to the control groups  
536 were determined and proteins with a global false discovery rate of >0.05 were deemed  
537 significant.

538

539 **3T3-L1 cells.** 3T3-L1 cells (ATCC) were maintained in Dulbecco's Modified Eagle's Medium -  
540 high glucose (DMEM/D6429, Sigma-Aldrich) supplemented with 10% Foetal Bovine Serum  
541 and 1% penicillin/streptomycin at 37°C/5% CO<sub>2</sub>. Cells were grown until confluent, passaged

542 and plated into 12-well tissue culture plates for differentiation. The differentiation protocol was  
543 initiated 5 days later. Cells were treated with 10µg/mL insulin (Sigma-Aldrich), 1µM  
544 dexamethasone (Sigma-Aldrich), 1µM rosiglitazone (AduoQ Bioscience) and 0.5mM IBMX  
545 (Sigma-Aldrich) prepared in DMEM + 10% FBS + 1% Pen/Strep for 3 days. On day 3 and day  
546 5 the cell culture media was changed to 10µg/mL insulin and 1µM rosiglitazone in DMEM +  
547 10% FBS + 1% Pen/Strep. On day 7, the cell culture media was changed to 10µg/mL insulin  
548 in DMEM + 10% FBS + 1% Pen/Strep. Finally on day 10, the cell culture media was changed  
549 to DMEM + 10% FBS + 1% Pen/Strep without any additional differentiation mediators. Cells  
550 were used from day 11 onwards. Lipid droplets were visible by day 5.

551

552 For knockdown studies, mature 3T3-L1 adipocytes were transfected with Sicontrol (Control  
553 ON-TARGETplus siRNA, Dharmacon), SiReverba (Mouse NR1D1 ON-TARGETplus siRNA,  
554 Dharmacon) or SiReverbβ (Mouse NR1D2 ON-TARGETplus siRNA, Dharmacon) at 50nM  
555 concentration using Lipofectamine RNAiMAX (Invitrogen) as a transfection reagent. Briefly,  
556 12-well plates were coated with poly-L-lysine hydrobromide (Sigma) and incubated for 20-30  
557 minutes prior to excess poly-L-lysine being removed and the plates allowed to dry. SiRNAs  
558 and RNAiMAX transfection reagent were separately mixed with reduced serum media (Opti-  
559 MEM, Gibco). The control or Reverba/β SiRNA was then added to each well and mixed with  
560 an equal quantity of RNAiMAX and then incubated for 5 minutes at room temperature. Mature  
561 3T3-L1 adipocytes were trypsinised (trypsin-EDTA solution, Sigma) and resuspended in FBS  
562 without P/S prior to being re-plated into the wells containing the SiRNA. After 24 hours the  
563 transfection mix was removed and replaced with DMEM without FBS or P/S. The cells were  
564 then collected 48 hours after transfection.

565

566 **RNA extraction (cells).** RNA was extracted from cells using the ReliaPrep™ RNA Cell  
567 Miniprep system (Promega, UK), following manufacturer's instructions. RNA concentration  
568 and quality was determined with the use of a NanoDrop spectrophotometer and then stored  
569 at -80°C.

570

571 **RNA extraction (tissue).** Frozen adipose tissue was homogenised in TRIzol Reagent  
572 (Invitrogen) using Lysing Matrix D tubes (MP Biomedicals) and total RNA extracted according  
573 to the manufacturer's TRIzol protocol. To remove excess lipid, samples then underwent an  
574 additional centrifugation (full speed, 5 minutes, room temperature) prior to chloroform addition.  
575 For the RNA sequencing samples the isopropanol phase of TRIzol extraction was transferred  
576 to Reliaprep tissue Miniprep kit (Promega, USA) columns to ensure high quality RNA samples  
577 were used. The column was then washed, DNase treated and RNA eluted as per protocol.  
578 RNA concentration and quality was determined with the use of a NanoDrop spectrophotometer  
579 and then stored at -80°C. For RNA-seq, RNA was diluted to 1000ng in nuclease-free water to  
580 a final volume of 20uL.

581

582 **RT-qPCR.** For RT-qPCR, samples were DNase treated (RQ1 RNase-Free DNase, Promega,  
583 USA) prior to cDNA conversion High Capacity RNA-to-cDNA kit (Applied Biosystems). qPCR  
584 was performed using a GoTaq qPCR Master Mix (Promega, USA) and primers listed in  
585 Supplementary Table 1 using a Step One Plus (Applied Biosystems) qPCR machine. Relative  
586 quantities of gene expression were determined using the  $[\Delta][\Delta]$  Ct method and  
587 normalised with the use of a geometric mean of the housekeeping genes *Hprt*, *Ppib* and *Actb*.  
588 The fold difference of expression was calculated relative to the values of control groups.

589

590 **RNA-seq.** Adipose tissue was collected from adult male mice (n=6-8 per group) at ZT8 and  
591 flash-frozen. Total RNA was extracted and DNase-treated as described above. Biological  
592 replicates were taken forward individually to library preparation and sequencing. For library  
593 preparation, total RNA was submitted to the Genomic Technologies Core Facility (GTCF).  
594 Quality and integrity of the RNA samples were assessed using a 2200 TapeStation (Agilent  
595 Technologies) and then libraries generated using the TruSeq® Stranded mRNA assay  
596 (Illumina, Inc.) according to the manufacturer's protocol. Briefly, total RNA (0.1-4µg) was used  
597 as input material from which polyadenylated mRNA was purified using poly-T, oligo-attached,

598 magnetic beads. The mRNA was then fragmented using divalent cations under elevated  
599 temperature and then reverse transcribed into first strand cDNA using random primers.  
600 Second strand cDNA was then synthesised using DNA Polymerase I and RNase H. Following  
601 a single 'A' base addition, adapters were ligated to the cDNA fragments, and the products then  
602 purified and enriched by PCR to create the final cDNA library. Adapter indices were used to  
603 multiplex libraries, which were pooled prior to cluster generation using a cBot instrument. The  
604 loaded flow-cell was then paired-end sequenced (76 + 76 cycles, plus indices) on an Illumina  
605 HiSeq4000 instrument. Finally, the output data was demultiplexed (allowing one mismatch)  
606 and BCL-to-Fastq conversion performed using Illumina's bcl2fastq software, version 2.17.1.14  
607

608 **RNA-seq data processing & differential gene expression analysis.** Paired-end RNA-seq  
609 reads were quality assessed using FastQC (v 0.11.3), FastQ Screen (v 0.9.2) (Wingett and  
610 Andrews, 2018). Reads were processed with Trimmomatic (v 0.36) (Bolger et al., 2014) to  
611 remove any remaining sequencing adapters and poor quality bases. RNA-seq reads were  
612 then mapped against the reference genome (mm10) using STAR (version 2.5.3a) (Dobin et  
613 al., 2013). Counts per gene (exons) were calculated by STAR using the genome annotation  
614 from GENCODEM16. Differential expression analysis was then performed with edgeR  
615 (Robinson et al., 2010) using QLF-tests based on published code (Chen et al., 2016). Changes  
616 were considered significant if they reached a FDR cut-off of <0.05. Interaction analysis was  
617 performed with stageR (Van den Berge et al., 2017) in conjunction with Limma voom (Law et  
618 al., 2014), setting alpha at 0.05.

619  
620 **Published ChIP-seq.** Raw gWAT ChIP-seq data (Zhang et al., 2015) was downloaded from  
621 the GEO Sequence Read Archive (GSE67973) using the sratoolkit package (v2.9.2) (*fastq-*  
622 *dump* tool). The following datasets were used: REVERB $\alpha$  ZT10 ChIP-seq (two replicates) -  
623 SRR1977510, SRR1977511 – and ZT10 input raw data - SRR1977512. Reads were aligned  
624 to the mm10 genome with Bowtie2 (v.2.3.4.3) (Langmead and Salzberg, 2012), then sorted,  
625 indexed BAM files were produced with SAMtools (v.1.9) (Li et al., 2009). MACS2 (Zhang et

626 al., 2008) was used to call peaks from the experimental BAM files (-t) against the input control  
627 BAM file (-c), with the following options specified: `-f BAMPE -g mm --keep-dup=1 -q 0.01 --`  
628 `bdg --SPMR --verbose 0`. High-stringency peaks were defined as those with >7.5 fold-  
629 enrichment over input.

630

631 **Integrating RNA-seq and ChIP-seq.** In order to calculate enrichment of RNA-seq-based  
632 gene clusters with respect to ChIP-seq peaks, we used our in-house custom tool (Yang et al.,  
633 2019) which calculates gene cluster enrichment within specified distances from the centre of  
634 peaks (see also *Code Availability* statement below). The tool extends peaks in both directions  
635 for the given distances and extracts all genes whose TSSs overlap with the extended peaks.  
636 Given these genes, the inputted RNA-seq-based gene cluster, and the overlap of these two  
637 groups, it performs a hypergeometric test with the total number of genes in the mm10  
638 genomes as background.

639

640 **Pathway analysis.** Pathway enrichment analysis of ENTREZ gene identifiers, either extracted  
641 from RNA-seq or proteomics data, was carried out using the R Bioconductor package  
642 *ReactomePA* (Yu and He, 2016). The *enrichPathway* tool was used with the following  
643 parameters: `organism = "mouse"`, `pAdjustMethod = "BH"`, `maxGSSize = 2000`, `readable =`  
644 `FALSE`. We considered pathways with a  $P_{adj} < 0.01$  to be significantly enriched. For Figure  
645 S3A, no pathways had  $P_{adj} < 0.01$  (likely due to the small number of inputted genes), hence  
646 we show the 5 pathways with the smallest  $P_{adj}$  values.

647

648 **Protein extraction and Western blotting.** Small pieces (<100mg) of tissue were  
649 homogenised with the FastPrep Lysing Matrix D system (MP Biomedicals) in T-PER (Thermo  
650 Fisher Scientific), supplemented with protease inhibitor cocktail (Promega) at 1:50 dilution.  
651 Benzoylase nuclease (EMD Millipore) was added (2 $\mu$ l), the homogenate briefly vortexed, then  
652 incubated on ice for 10 minutes. Homogenates were then centrifuged for 8 minutes at 10,000g,  
653 at 4°C, and the supernatant removed (avoiding any lipid layer). Protein concentration was

654 quantified using the Bio-Rad Protein Assay (Bio-Rad). For Western blotting, equal quantities  
655 (75µg for detection of REVERBα) of protein were added to 4x NuPAGE LDS sample buffer  
656 (Invitrogen), NuPAGE sample reducing agent (dithiothreitol) (Invitrogen) and water, and  
657 denatured at 70°C for 10 minutes. Samples were run on 4-20% Mini-PROTEAN TGX Precast  
658 Protein Gels (Bio-Rad) before wet transfer to nitrocellulose membranes. Membranes were  
659 blocked with Protein-Free Blot Blocking Buffer (Azure Biosystems), and subsequent  
660 incubation and wash steps carried out following manufacturer's instructions. Primary and  
661 secondary antibodies used were as listed in Supplementary Table 2, with primary antibodies  
662 being used at a 1:1000 dilution and secondary antibodies at 1:10,000. Membranes were  
663 imaged using chemiluminescence or the LI-COR Odyssey system. Uncropped blot images  
664 can be provided by the corresponding author upon request.

665

666 **Statistics.** To compare two or more groups, t-tests or ANOVAs were carried out using  
667 GraphPad Prism (v.8.4.0). For all of these, the exact statistical test used and n numbers are  
668 indicated in the figure legends. All n numbers refer to individual biological replicates (ie.  
669 individual animals). Unless otherwise specified, bar height is at mean, with error bars  
670 indicating +/-SEM. In these tests, significance is defined as \*P<0.05 or \*\*P<0.01 (P values  
671 below 0.01 were not categorised separately, i.e. no more than two stars were used, as we  
672 deemed this to be a meaningful significance cut-off). Statistical analyses of proteomics, RNA-  
673 seq and ChIP-seq data were carried out as described above in Methods, using the significance  
674 cut-offs mentioned. Plots were produced using GraphPad Prism or R package ggplot2.

675

676 **Data availability.** RNA-seq data generated in the course of this study has been uploaded to  
677 ArrayExpress and is available at [http://www.ebi.ac.uk/arrayexpress/experiments/E-MTAB-](http://www.ebi.ac.uk/arrayexpress/experiments/E-MTAB-8840)  
678 [8840](http://www.ebi.ac.uk/arrayexpress/experiments/E-MTAB-8840). Raw proteomics data has been uploaded to Mendeley Data  
679 ([https://data.mendeley.com/datasets/wskyz3rhsg/draft?a=ef40a1ec-36a4-4509-979d-](https://data.mendeley.com/datasets/wskyz3rhsg/draft?a=ef40a1ec-36a4-4509-979d-32d494b96585)  
680 [32d494b96585](https://data.mendeley.com/datasets/wskyz3rhsg/draft?a=ef40a1ec-36a4-4509-979d-32d494b96585)). Other data supporting the findings of this study are available from the  
681 corresponding author upon reasonable request.

682

683 **Code availability.** The custom Python code (Yang et al., 2019) used to carry out the peaks-

684 genes enrichment analysis in this study is available at

685 <http://bartzabel.ls.manchester.ac.uk//Pete/PF5HZns0zv/pegs-0.2.0.tgz>.

686

687 **ACKNOWLEDGEMENTS & AUTHOR CONTRIBUTIONS**

688

689 **Acknowledgements:** We thank Rachel Scholey, I-Hsuan Lin, Ping Wang and Peter Briggs  
690 (Bioinformatics Core Facility, UoM), and Thea Danby (Faculty of Biology, Medicine and Health,  
691 UoM) for statistical and technical assistance, and acknowledge support of core facilities at the  
692 University of Manchester: Genomic Technologies Core Facility, Biological Services Unit, and  
693 Histological Services Unit. We also acknowledge and thank the support of our funders: the  
694 BBSRC (BB/I018654/1 to D.A.B.), the MRC (Clinical Research Training Fellowship  
695 MR/N021479/1 to A.L.H.; MR/P00279X/1 to D.A.B; MR/P011853/1 and MR/P023576/1 to  
696 D.W.R.), and the Wellcome Trust (107849/Z/15/Z, 107851/Z/15/Z).

697 **Author Contributions:** Conceptualisation, A.L.H., C.E.P., D.W.R., D.A.B.; Methodology,  
698 A.A., R.D.U., D.W.R., D.A.B.; Software, M.I., A.L.H.; Investigation, A.L.H., C.E.P., P.D., T.C.,  
699 P.S.C., N.J.B., R.C.N.; Formal Analysis, A.L.H., C.E.P., R.D.U., L.H., M.I., D.A.B.; Writing,  
700 A.L.H., C.E.P., A.S.I.L., D.W.R., D.A.B.; Funding Acquisition, A.L.H., D.W.R., D.A.B.;  
701 Supervision, D.A.B.

702 **Declaration of Interests:** The authors declare no competing interests.



703 **REFERENCES**

704

705 Aucouturier J, Duché P, Timmons BW. 2011. Metabolic flexibility and obesity in children and  
706 youth. *Obes Rev* **12**:e44–e53. doi:10.1111/j.1467-789X.2010.00812.x

707 Barnea M, Chapnik N, Genzer Y, Froy O. 2015. The circadian clock machinery controls  
708 adiponectin expression. *Mol Cell Endocrinol* **399**:284–287.

709 doi:10.1016/j.mce.2014.10.018

710 Bass J, Takahashi JS. 2010. Circadian integration of metabolism and energetics. *Science*  
711 (80-). doi:10.1126/science.1195027

712 Begaye B, Vinales KL, Hollstein T, Ando T, Walter M, Bogardus C, Krakoff J, Piaggi P. 2020.  
713 Impaired metabolic flexibility to high-fat overfeeding predicts future weight gain in  
714 healthy adults. *Diabetes* **69**:181–192. doi:10.2337/db19-0719

715 Bolger AM, Lohse M, Usadel B. 2014. Trimmomatic: a flexible trimmer for Illumina sequence  
716 data. *Bioinformatics* **30**:2114–2120. doi:10.1093/bioinformatics/btu170

717 Broussard JL, Cauter E Van. 2016. Disturbances of sleep and circadian rhythms: Novel risk  
718 factors for obesity. *Curr Opin Endocrinol Diabetes Obes.*

719 doi:10.1097/MED.0000000000000276

720 Bugge A, Feng D, Everett LJ, Briggs ER, Mullican SE, Wang F, Jager J, Lazar MA. 2012.  
721 Rev-erb $\alpha$  and Rev-erb $\beta$  coordinately protect the circadian clock and normal  
722 metabolic function. *Genes Dev* **26**:657–667. doi:10.1101/gad.186858.112

723 Chang J, Garva R, Pickard A, Yeung CYC, Mallikarjun V, Swift J, Holmes DF, Calverley B, Lu  
724 Y, Adamson A, Raymond-Hayling H, Jensen O, Shearer T, Meng QJ, Kadler KE. 2020.  
725 Circadian control of the secretory pathway maintains collagen homeostasis. *Nat Cell*  
726 *Biol* **22**:74–86. doi:10.1038/s41556-019-0441-z

727 Chawla A, Lazar MA. 1993. Induction of Rev-ErbA $\alpha$ , an orphan receptor encoded on the  
728 opposite strand of the  $\alpha$ -thyroid hormone receptor gene, during adipocyte  
729 differentiation. *J Biol Chem* **268**:16265–16269.

730 Chen Y, Lun ATL, Smyth GK. 2016. From reads to genes to pathways: differential expression

- 731 analysis of RNA-Seq experiments using Rsubread and the edgeR quasi-likelihood  
732 pipeline. *F1000Research* **5**:1438. doi:10.12688/f1000research.8987.2
- 733 Damiola F, Le Minli N, Preitner N, Kornmann B, Fleury-Olela F, Schibler U. 2000. Restricted  
734 feeding uncouples circadian oscillators in peripheral tissues from the central pacemaker  
735 in the suprachiasmatic nucleus. *Genes Dev* **14**:2950–2961. doi:10.1101/gad.183500
- 736 Delezie J, Dumont S, Dardente H, Oudart H, Grechez-Cassiau A, Klosen P, Teboul M,  
737 Delaunay F, Pevet P, Challet E. 2012. The nuclear receptor REV-ERBalpha is required  
738 for the daily balance of carbohydrate and lipid metabolism. *FASEB J* **26**:3321–3335.  
739 doi:10.1096/fj.12-208751
- 740 Dibner C, Schibler U, Albrecht U. 2010. The Mammalian Circadian Timing System:  
741 Organization and Coordination of Central and Peripheral Clocks. *Annu Rev Physiol*  
742 **72**:517–549. doi:10.1146/annurev-physiol-021909-135821
- 743 Dierickx P, Emmett MJ, Jiang C, Uehara K, Liu M, Adlanmerini M, Lazar MA. 2019. SR9009  
744 has REV-ERB-independent effects on cell proliferation and metabolism. *Proc Natl Acad*  
745 *Sci* **116**:12147–12152. doi:10.1073/pnas.1904226116
- 746 Dobin A, Davis CA, Schlesinger F, Drenkow J, Zaleski C, Jha S, Batut P, Chaisson M,  
747 Gingeras TR. 2013. STAR: ultrafast universal RNA-seq aligner. *Bioinformatics* **29**:15–  
748 21. doi:10.1093/bioinformatics/bts635
- 749 Dudek M, Gossan N, Yang N, Im H-J, Ruckshanthi JPD, Yoshitane H, Li X, Jin D, Wang P,  
750 Boudiffa M, Bellantuono I, Fukada Y, Boot-Handford RP, Meng Q-J. 2015. The  
751 chondrocyte clock gene Bmal1 controls cartilage homeostasis and integrity. *J Clin*  
752 *Invest* **126**:365–376. doi:10.1172/JCI82755
- 753 Dyar KA, Lutter D, Artati A, Ceglia NJ, Liu Y, Armenta D, Jastroch M, Schneider S, de Mateo  
754 S, Cervantes M, Abbondante S, Tognini P, Orozco-Solis R, Kinouchi K, Wang C,  
755 Swerdloff R, Nadeef S, Masri S, Magistretti P, Orlando V, Borrelli E, Uhlentaut NH,  
756 Baldi P, Adamski J, Tschöp MH, Eckel-Mahan K, Sassone-Corsi P. 2018. Atlas of  
757 Circadian Metabolism Reveals System-wide Coordination and Communication between  
758 Clocks. *Cell* **174**:1571-1585.e11. doi:10.1016/j.cell.2018.08.042

- 759 Eckel-Mahan KL, Patel VR, De Mateo S, Orozco-Solis R, Ceglia NJ, Sahar S, Dilag-Penilla  
760 SA, Dyar KA, Baldi P, Sassone-Corsi P. 2013. Reprogramming of the circadian clock by  
761 nutritional challenge. *Cell* **155**:1464–1478. doi:10.1016/j.cell.2013.11.034
- 762 Eguchi J, Wang X, Yu S, Kershaw EE, Chiu PC, Dushay J, Estall JL, Klein U, Maratos-Flier  
763 E, Rosen ED. 2011. Transcriptional Control of Adipose Lipid Handling by IRF4. *Cell*  
764 *Metab* **13**:249–259. doi:10.1016/j.cmet.2011.02.005
- 765 Feng D, Liu T, Sun Z, Bugge A, Mullican SE, Alenghat T, Liu XS, Lazar MA. 2011. A circadian  
766 rhythm orchestrated by histone deacetylase 3 controls hepatic lipid metabolism.  
767 *Science (80- )* **331**:1315–1319. doi:10.1126/science.1198125
- 768 Folch J, Lees M, Sloane Stanley GH. 1957. A simple method for the isolation and purification  
769 of total lipides from animal tissues. *J Biol Chem* **226**:497–509.
- 770 Gerhart-Hines Z, Feng D, Emmett MJ, Everett LJ, Loro E, Briggs ER, Bugge A, Hou C,  
771 Ferrara C, Seale P, Pryma DA, Khurana TS, Lazar MA. 2013. The nuclear receptor  
772 Rev-erba controls circadian thermogenic plasticity. *Nature* **503**:410–413.  
773 doi:10.1038/nature12642
- 774 Goldstein I, Baek S, Presman DM, Paakinaho V, Swinstead EE, Hager GL. 2017.  
775 Transcription factor assisted loading and enhancer dynamics dictate the hepatic fasting  
776 response. *Genome Res* **27**:427–439. doi:10.1101/gr.212175.116
- 777 Guan D, Xiong Y, Borck PC, Jang C, Doulias P-T, Papazyan R, Fang B, Jiang C, Zhang Y,  
778 Briggs ER, Hu W, Steger D, Ischiropoulos H, Rabinowitz JD, Lazar MA. 2018. Diet-  
779 Induced Circadian Enhancer Remodeling Synchronizes Opposing Hepatic Lipid  
780 Metabolic Processes. *Cell* **174**:831-842.e12. doi:10.1016/j.cell.2018.06.031
- 781 Guo H, Brewer JM, Champhekar A, Harris RBS, Bittman EL. 2005. Differential control of  
782 peripheral circadian rhythms by suprachiasmatic-dependent neural signals. *Proc Natl*  
783 *Acad Sci* **102**:3111–3116. doi:10.1073/pnas.0409734102
- 784 Hand LE, Usan P, Cooper GJS, Xu LY, Ammori B, Cunningham PS, Aghamohammadzadeh  
785 R, Soran H, Greenstein A, Loudon ASI, Bechtold DA, Ray DW. 2015. Adiponectin  
786 Induces A20 Expression in Adipose Tissue to Confer Metabolic Benefit. *Diabetes*

- 787           **64**:128–136. doi:10.2337/db13-1835
- 788   Heath RB, Karpe F, Milne RW, Burdge GC, Wootton SA, Frayn KN. 2003. Selective  
789       partitioning of dietary fatty acids into the VLDL TG pool in the early postprandial period.  
790       *J Lipid Res* **44**:2065–2072. doi:10.1194/jlr.M300167-JLR200
- 791   Hughes ME, Hong H-K, Chong JL, Indacochea AA, Lee SS, Han M, Takahashi JS,  
792       Hogenesch JB. 2012. Brain-specific rescue of Clock reveals system-driven  
793       transcriptional rhythms in peripheral tissue. *PLoS Genet* **8**:e1002835.  
794       doi:10.1371/journal.pgen.1002835
- 795   Hunter AL, Pelekanou CE, Adamson A, Downton P, Barron NJ, Cornfield T, Poolman TM,  
796       Humphreys N, Cunningham PS, Hodson L, Loudon AS, Iqbal M, Bechtold DA, Ray DW.  
797       2020. Nuclear receptor REVERB $\alpha$  is a state-dependent regulator of liver energy  
798       metabolism. *Proc Natl Acad Sci U S A* **In press**. doi:10.1073/pnas.2005330117
- 799   Jager J, Wang F, Fang B, Lim H-W, Peed LC, Steger DJ, Won K-J, Kharitononkov A, Adams  
800       AC, Lazar MA. 2016. The Nuclear Receptor Rev-erb $\alpha$  Regulates Adipose Tissue-  
801       specific FGF21 Signaling. *J Biol Chem* **291**:10867–75. doi:10.1074/jbc.M116.719120
- 802   Jeffery E, Berry R, Church CD, Yu S, Shook BA, Horsley V, Rosen ED, Rodeheffer MS.  
803       2014. Characterization of Cre recombinase models for the study of adipose tissue.  
804       *Adipocyte* **3**:206–211. doi:10.4161/adip.29674
- 805   Jonker JW, Suh JM, Atkins AR, Ahmadian M, Li P, Whyte J, He M, Juguilon H, Yin YQ,  
806       Phillips CT, Yu RT, Olefsky JM, Henry RR, Downes M, Evans RM. 2012. A PPAR $\gamma$ -  
807       FGF1 axis is required for adaptive adipose remodelling and metabolic homeostasis.  
808       *Nature* **485**:391–394. doi:10.1038/nature10998
- 809   Kim HJ, Choi S, Kim Kyuwoong, Park H, Kim Kyae-hyung, Park SM, Jun H, Choi S, Kim  
810       Kyuwoong, Park H, Kim HJ. 2019. Association between misalignment of circadian  
811       rhythm and obesity in Korean men : Sixth Korea National Health and Nutrition  
812       Examination Survey Association between misalignment of circadian rhythm and obesity  
813       in Korean men : Sixth Korea National Health and . *Chronobiol Int* **00**:1–9.  
814       doi:10.1080/07420528.2019.1671439

- 815 Kim JY, Van De Wall E, Laplante M, Azzara A, Trujillo ME, Hofmann SM, Schraw T, Durand  
816 JL, Li H, Li G, Jelicks LA, Mehler MF, Hui DY, Deshaies Y, Shulman GI, Schwartz GJ,  
817 Scherer PE. 2007. Obesity-associated improvements in metabolic profile through  
818 expansion of adipose tissue. *J Clin Invest* **117**:2621–2637. doi:10.1172/JCI31021
- 819 Kim YH, Marhon SA, Zhang Y, Steger DJ, Won KJ, Lazar MA. 2018. Rev-erba dynamically  
820 modulates chromatin looping to control circadian gene transcription. *Science (80- )*  
821 **359**:1274–1277. doi:10.1126/science.aao6891
- 822 Kinouchi K, Magnan C, Ceglia N, Liu Y, Cervantes M, Pastore N, Huynh T, Ballabio A, Baldi  
823 P, Masri S, Sassone-Corsi P. 2018. Fasting Imparts a Switch to Alternative Daily  
824 Pathways in Liver and Muscle. *Cell Rep* **25**:3299-3314.e6.  
825 doi:10.1016/j.celrep.2018.11.077
- 826 Kolbe I, Husse J, Salinas G, Lingner T, Astiz M, Oster H. 2016. The SCN Clock Governs  
827 Circadian Transcription Rhythms in Murine Epididymal White Adipose Tissue. *J Biol*  
828 *Rhythms* **31**:577–587. doi:10.1177/0748730416666170
- 829 Kornmann B, Schaad O, Bujard H, Takahashi JS, Schibler U. 2007. System-driven and  
830 oscillator-dependent circadian transcription in mice with a conditionally active liver  
831 clock. *PLoS Biol* **5**:e34. doi:10.1371/journal.pbio.0050034
- 832 Koronowski KB, Kinouchi K, Welz PS, Smith JG, Zinna VM, Shi J, Samad M, Chen S,  
833 Magnan CN, Kinchen JM, Li W, Baldi P, Benitah SA, Sassone-Corsi P. 2019. Defining  
834 the Independence of the Liver Circadian Clock. *Cell* **177**:1448–1462.  
835 doi:10.1016/j.cell.2019.04.025
- 836 Kumar N, Solt LA, Wang Y, Rogers PM, Bhattacharyya G, Kamenecka TM, Stayrook KR,  
837 Crumbley C, Floyd ZE, Gimble JM, Griffin PR, Burriss TP. 2010. Regulation of  
838 adipogenesis by natural and synthetic REV-ERB ligands. *Endocrinology* **151**:3015–  
839 3025. doi:10.1210/en.2009-0800
- 840 Lamia KA, Storch K-F, Weitz CJ. 2008. Physiological significance of a peripheral tissue  
841 circadian clock. *Proc Natl Acad Sci* **105**:15172–7. doi:10.1073/pnas.0806717105
- 842 Langmead B, Salzberg SL. 2012. Fast gapped-read alignment with Bowtie 2. *Nat Methods*

- 843           **9**:357–359. doi:10.1038/nmeth.1923
- 844   Law CW, Chen Y, Shi W, Smyth GK. 2014. voom: Precision weights unlock linear model  
845       analysis tools for RNA-seq read counts. *Genome Biol* **15**:R29. doi:10.1186/gb-2014-15-  
846       2-r29
- 847   Le Martelot G, Claudel T, Gatfield D, Schaad O, Kornmann B, Lo Sasso G, Moschetta A,  
848       Schibler U. 2009. REV-ERB $\alpha$  participates in circadian SREBP signaling and bile acid  
849       homeostasis. *PLoS Biol* **7**:e1000181. doi:10.1371/journal.pbio.1000181
- 850   Li H, Handsaker B, Wysoker A, Fennell T, Ruan J, Homer N, Marth G, Abecasis G, Durbin R,  
851       1000 Genome Project Data Processing Subgroup. 2009. The Sequence Alignment/Map  
852       format and SAMtools. *Bioinformatics* **25**:2078–2079. doi:10.1093/bioinformatics/btp352
- 853   Masri S, Papagiannakopoulos T, Kinouchi K, Liu Y, Cervantes M, Baldi P, Jacks T, Sassone-  
854       Corsi P. 2016. Lung Adenocarcinoma Distally Rewires Hepatic Circadian Homeostasis.  
855       *Cell* **165**:896–909. doi:10.1016/j.cell.2016.04.039
- 856   Mistlberger RE. 1994. Circadian food-anticipatory activity: formal models and physiological  
857       mechanisms. *Neurosci Biobehav Rev* **18**:171–95.
- 858   Paschos GK, Ibrahim S, Song W-LL, Kunieda T, Grant G, Reyes TM, Bradfield CA, Vaughan  
859       CH, Eiden M, Masoodi M, Griffin JL, Wang F, Lawson JA, Fitzgerald GA. 2012. Obesity  
860       in mice with adipocyte-specific deletion of clock component Arntl. *Nat Med* **18**:1768–  
861       1777. doi:10.1038/nm.2979
- 862   Preitner N, Damiola F, Luis-Lopez-Molina, Zakany J, Duboule D, Albrecht U, Schibler U.  
863       2002. The Orphan Nuclear Receptor REV-ERB $\alpha$  Controls Circadian Transcription within  
864       the Positive Limb of the Mammalian Circadian Oscillator. *Cell* **110**:251–260.  
865       doi:10.1016/S0092-8674(02)00825-5
- 866   Quagliarini F, Mir AA, Balazs K, Wierer M, Dyar KA, Jouffe C, Makris K, Hawe J, Heinig M,  
867       Filipp FV, Barish GD, Uhlentaut NH. 2019. Cistronic Reprogramming of the Diurnal  
868       Glucocorticoid Hormone Response by High-Fat Diet. *Mol Cell* **76**:531-545.e5.  
869       doi:10.1016/j.molcel.2019.10.007
- 870   Reinke H, Asher G. 2019. Crosstalk between metabolism and circadian clocks. *Nat Rev Mol*

- 871 *Cell Biol.* doi:10.1038/s41580-018-0096-9
- 872 Robinson MD, McCarthy DJ, Smyth GK. 2010. edgeR: a Bioconductor package for  
873 differential expression analysis of digital gene expression data. *Bioinformatics* **26**:139–  
874 140. doi:10.1093/bioinformatics/btp616
- 875 Sherratt MJ, Hopkinson L, Naven M, Hibbert SA, Ozols M, Eckersley A, Newton VL, Bell M,  
876 Meng Q-J. 2019. Circadian rhythms in skin and other elastic tissues. *Matrix Biol.*  
877 doi:10.1016/j.matbio.2019.08.004
- 878 Shostak A, Meyer-Kovac J, Oster H. 2013. Circadian regulation of lipid mobilization in white  
879 adipose tissues. *Diabetes* **62**:2195–2203. doi:10.2337/db12-1449
- 880 Solt LA, Wang Y, Banerjee S, Hughes T, Kojetin DJ, Lundasen T, Shin Y, Liu J, Cameron  
881 MD, Noel R, Yoo S-H, Takahashi JS, Butler AA, Kamenecka TM, Burris TP. 2012.  
882 Regulation of circadian behaviour and metabolism by synthetic REV-ERB agonists.  
883 *Nature* **485**:62–8. doi:10.1038/nature11030
- 884 Tognini P, Murakami M, Liu Y, Eckel-Mahan KL, Newman JC, Verdin E, Baldi P, Sassone-  
885 Corsi P. 2017. Distinct Circadian Signatures in Liver and Gut Clocks Revealed by  
886 Ketogenic Diet. *Cell Metab* **26**:523-538.e5. doi:10.1016/j.cmet.2017.08.015
- 887 Van den Berge K, Sonesson C, Robinson MD, Clement L. 2017. stageR: A general stage-  
888 wise method for controlling the gene-level false discovery rate in differential expression  
889 and differential transcript usage. *Genome Biol* **18**:151. doi:10.1186/s13059-017-1277-0
- 890 Virtue S, Petkevicius K, Moreno-Navarrete JM, Jenkins B, Hart D, Dale M, Koulman A,  
891 Fernández-Real JM, Vidal-Puig A. 2018. Peroxisome Proliferator-Activated Receptor  $\gamma$ 2  
892 Controls the Rate of Adipose Tissue Lipid Storage and Determines Metabolic Flexibility.  
893 *Cell Rep* **24**:2005-2012.e7. doi:10.1016/j.celrep.2018.07.063
- 894 West AC, Bechtold DA. 2015. The cost of circadian desynchrony: Evidence, insights and  
895 open questions. *BioEssays* **37**:777–788. doi:10.1002/bies.201400173
- 896 Wingett SW, Andrews S. 2018. FastQ Screen: A tool for multi-genome mapping and quality  
897 control. *F1000Research* **7**:1338. doi:10.12688/f1000research.15931.2
- 898 Xu J, Patassini S, Rustogi N, Riba-Garcia I, Hale BD, Phillips AM, Waldvogel H, Haines R,



- 899 Bradbury P, Stevens A, Faull RLM, Dowsey AW, Cooper GJS, Unwin RD. 2019.  
900 Regional protein expression in human Alzheimer's brain correlates with disease  
901 severity. *Commun Biol* **2**:43. doi:10.1038/s42003-018-0254-9
- 902 Yamamoto T, Nakahata Y, Soma H, Akashi M, Mamine T, Takumi T. 2004. Transcriptional  
903 oscillation of canonical clock genes in mouse peripheral tissues. *BMC Mol Biol* **5**:18.  
904 doi:10.1186/1471-2199-5-18
- 905 Yang S-H, Andrabi M, Biss R, Baker SM, Iqbal M, Sharrocks AD. 2019. ZIC3 Controls the  
906 Transition from Naïve to Primed Pluripotency. *Cell Rep* **27**:3215–3227.  
907 doi:10.1016/j.celrep.2019.05.026
- 908 Yu G, He QY. 2016. ReactomePA: An R/Bioconductor package for reactome pathway  
909 analysis and visualization. *Mol Biosyst* **12**:477–479. doi:10.1039/c5mb00663e
- 910 Zhang Y, Fang B, Damle M, Guan D, Li Z, Kim YH, Gannon M, Lazar MA. 2016. HNF6 and  
911 Rev-erbalpha integrate hepatic lipid metabolism by overlapping and distinct  
912 transcriptional mechanisms. *Genes Dev* **30**:1636–1644. doi:10.1101/gad.281972.116
- 913 Zhang Y, Fang B, Emmett MJ, Damle M, Sun Z, Feng D, Armour SM, Remsberg JR, Jager J,  
914 Soccio RE, Steger DJ, Lazar MA. 2015. Discrete functions of nuclear receptor Rev-  
915 erbalpha couple metabolism to the clock. *Science (80- )* **348**:1488–1492.  
916 doi:10.1126/science.aab3021
- 917 Zhang Y, Liu T, Meyer CA, Eeckhoute J, Johnson DS, Bernstein BE, Nussbaum C, Myers  
918 RM, Brown M, Li W, Liu XS. 2008. Model-based Analysis of ChIP-Seq (MACS).  
919 *Genome Biol* **9**:R137. doi:10.1186/gb-2008-9-9-r137
- 920 Zhang Y, Papazyan R, Damle M, Fang B, Jager J, Feng D, Peed LC, Guan D, Sun Z, Lazar  
921 MA. 2017. The hepatic circadian clock fine-tunes the lipogenic response to feeding  
922 through ROR $\alpha$ / $\gamma$ . *Genes Dev* **31**:1202–1211. doi:10.1101/gad.302323.117
- 923

SUPPLEMENTARY TABLE 1 - qPCR primer sequences

| Gene                            | Forward Primer (5'-3')             | Reverse Primer (5'-3')             |
|---------------------------------|------------------------------------|------------------------------------|
| <i>Acaca</i>                    | TAATGGGCTGCTTCTGTGACTC             | TCAATATCGCCATCACTCTTG              |
| <i>Acss3</i>                    | AATGTCGCAAAGTAACAGGCG              | GTGGGTCTTGTACTCACCACC              |
| <i>Actb</i>                     | GGCTGTATTCCCCTCCATCG               | CCAGTTGGTAACAATGCCATGT             |
| <i>Bmal1</i>                    | GTCGAATGATTGCCGAGGAA               | GGGAGGCGTACTTGTGATGTTT             |
| <i>Cd36</i>                     | CCACAGTTGGTGTGTTTTATCC             | TCAATTATGGCAACTTTGCTT              |
| <i>Col1a1</i>                   | TCCCAGAACATCACCTATCAC              | CTGTTGCCTTCGCCTCTGAG               |
| <i>Col5a3</i>                   | TACCTCTGGTAACCGGGGTCTC             | CCTTTTGGTCCCTCATCACCC              |
| <i>Col6a1</i>                   | TGCCCTGTGGATCTATTCTTCG             | CTGTCTCTCAGGTTGTCAATG              |
| <i>Col6a2</i>                   | TGGTCAACAGGCTAGGTGCCAT             | TAGACAGGGAGTTGACTCGCTC             |
| <i>Col6a3</i>                   | CTGTGCCTGCATTCATC                  | ACAACCCTCTGCACAAAGTC               |
| <i>Dio2</i>                     | CCAGACAACACTAGCATGGCGT             | GAAAATTGGCTGCCCCACAC               |
| <i>Elovl6</i>                   | GAGCAGAGGCGCAGAGAAC                | ATGCCGACCACCAAAGATAA               |
| <i>Fasn</i>                     | CCCAGAGGCTTGTGCTGACT               | CGAATGTGCTTGGCTTGGT                |
| <i>G6pdx</i>                    | AGACCTGCATGAGTCAGACG               | TGGTTCGACAGTTGATTGGA               |
| <i>Hprt</i>                     | GTTGGATACAGGCCAGACTTTGTTG          | GATTCAACTTGCCTCATCTTAGGC           |
| <i>Loxl4</i>                    | TTGCTCTCAAGGACACCTGGTA             | GCAGCGAACTCCACTCATCA               |
| <i>Lpl</i>                      | AGGGCTCTGCCTGAGTTGTA               | CCATCCTCAGTCCCAGAAAA               |
| <i>Me1</i>                      | GGGATTGCTCACTTGGTTGT               | GTTTCATGGGCAAACACCTCT              |
| <i>Pfk1</i>                     | TGCAGCCTACAATCTGCTCC               | GTCAAGTGTGCGTAGTTCTGA              |
| <i>Plin2</i>                    | AAGAGGCCAAACAAAAGAGCCAGGAGA<br>CCA | ACCCTGAATTTTCTGGTTGGCACTGTG<br>CAT |
| <i>Ppib</i>                     | GGAGATGGCACAGGAGGAAA               | CCGTAGTGCTTCAGTTTGAAGTTCT          |
| <i>Reverba</i>                  | GTCTCTCCGTTGGCATGTCT               | CCAAGTTCATGGCGCTCT                 |
| <i>Reverb<math>\beta</math></i> | CAGGAGGTGTGATTGCCTACA              | GGACGAGGACTGGAAGCTAAT              |
| <i>Scd1</i>                     | CGCTGGTGCCCTGGTACTGC               | CAGCCAGGTGGCGTTGAGCA               |
| <i>Ucp1</i>                     | ACTGCCACACCTCCAGTCATT              | CTTTGCCTCACTCAGGATTGG              |

**SUPPLEMENTARY TABLE 2 – Antibodies**

| <b>Source and target</b>                                     | <b>Manufacturer</b>       | <b>Catalogue identifier, lot</b>                  | <b>Use</b>                      |
|--------------------------------------------------------------|---------------------------|---------------------------------------------------|---------------------------------|
| Rabbit polyclonal anti-REVERB $\alpha$ (NR1D1)               | ProteinTech               | Cat#14506-1-AP, lot 5745;<br>RRID:AB_11182604     | Western blot, primary           |
| Mouse monoclonal anti-UCP1 (clone 536435)                    | R&D Systems               | Cat#MAB6158, lot CCNV0218091;<br>RRID:AB_10572490 | Western blot, primary           |
| Mouse monoclonal anti- $\beta$ -ACTIN (ACTB)                 | ProteinTech               | Cat#60008-1, lot 0001084;<br>RRID:AB_2289225      | Western blot, primary           |
| Sheep Anti-Mouse IgG, HRP-linked whole Ab                    | GE Healthcare             | Cat#NA931V, lot 16908225;<br>RRID:AB_772210       | Western blot, secondary         |
| Donkey Anti-Rabbit IgG, HRP-linked whole Ab                  | GE Healthcare             | Cat#NA934V, lot 16921443;<br>RRID:AB_772206       | Western blot, secondary         |
| Goat polyclonal Anti-Rabbit IgG (H+L), DyLight 680 Conjugate | Cell Signaling Technology | Cat#5366P, lot 7;<br>RRID:AB_10693812             | Western blot, secondary         |
| Rat monoclonal anti-F4/80                                    | Abcam                     | Cat#ab6640, lot 845724;<br>RRID:AB_1140040        | Immunohistochemistry, primary   |
| Goat biotinylated anti-rat IgG (affinity purified)           | H&L                       | Cat#BA-9400, lot ZB1216;<br>RRID:AB_2336202       | Immunohistochemistry, secondary |
